# Supplementary material for: Misidentification of runs of homozygosity islands in cattle caused by interference with copy number variation or large intermarker distances
Source: Genet Sel Evol. 2018 Aug 22;50:43. doi: 10.1186/s12711-018-0414-x (PMC6106898; doi:10.1186/s12711-018-0414-x)
Supplement: Supplementary file 1 — Additional file 1: Table S1. Descriptive statistics of inbreeding levels based on the sum of merged ROH for each breed. Table S2. List of ROH islands for the three breeds. Table S3. List of CNVR for the three breeds. Table S4. Details of the positions of individual ROH islands, proportions of individuals with CNV at each marker and proportion of inbred individuals and percentage of individuals with copy gain or loss in each ROH island. Table S5. Description of the ROH islands that were identified as artefacts due to coverage gaps and consensus CNVR with both copy loss (copy loss or both copy loss and copy gain). [file 12711_2018_414_MOESM1_ESM.xlsx]

## Sheet: Table S1
Table S1
Descriptive statistics of inbreeding levels based on sum of merged ROH runs in each breed (FROH)
Breed	n	Variable	Mean	Standard devition	Median	Minimum	Maximum
Brown Swiss	37	Length of ROH	334.333	78.8422	337.795	148.915	505.029
		FROH	13.313	3.13946	13.4509	5.92971	20.11
Tyrol Grey	52	Length of ROH	146.125	87.9735	119.007	45.0103	588.498
		FROH	5.00773	3.01486	4.07839	1.54251	20.1679
Pinzgauer	87	Length of ROH	140.17	46.8905	135.286	44.8563	282.108
		FROH	5.58149	1.86716	5.38704	1.78616	11.2334

## Sheet: Table S2
Table S2
List of ROH islands in all the three breeds.
ID	Chromosome	Brown Swiss			Tyrol Grey			Pinzgauer
		Start	End	Length	Start	End	Length	Start	End	Length
ROH01	1				83653181	85307764	1654583
ROH02	2							61126396	61886515	760119
ROH03	3				72237329	73035441	798112
ROH04	4				36340027	37684418	1344391
ROH05	5	16600378	19830701	3230323				17815628	19234083	1418455
ROH06	5							29616940	32708704	3091764
ROH07	5	75543085	77205976	1662891
ROH08	6	5238677	6697815	1459138	4950064	6752289	1802225	5092431	6752289	1659858
ROH09	6	32432759	34215534	1782775
ROH10	6	38281115	39821580	1540465	37291001	41838880	4547879	38198011	40707879	2509868
ROH11	6	49485001	49542605	57604
ROH12	6							66881120	68005195	1124075
ROH13	6							70992402	72259859	1267457
ROH14	6							79811800	82148240	2336440
ROH15	6	89145527	92887063	3741536				92075115	93312295	1237180
ROH16	7				41956864	43373505	1416641
ROH17	7	51178057	52533653	1355596	50966893	52940853	1973960	50934029	54040194	3106165
ROH18	7							55500414	55505723	5309
ROH19	8				32974596	38923407	5948811
ROH20	8							110543983	110650592	106609
ROH21	8							112888559	113367096	478537
ROH22	9				41027990	42194260	1166270
ROH23	9				45453381	47072377	1618996
ROH24	10	23889533	24998515	1108982	23319458	24480627	1161169	23889533	24998515	1108982
ROH25	11							95832985	96995965	1162980
ROH26	11							102280331	103339896	1059565
ROH27	12				42742472	44121483	1379011
ROH28	12	72432362	72467225	34863	70670517	75298059	4627542	70620665	75272584	4651919
ROH29	14							53164234	54030636	866402
ROH30	15							51502997	52640360	1137363
ROH31	15				52873792	52890562	16770
ROH32	16				6609810	7904840	1295030	6643328	7868828	1225500
ROH33	16	22077094	28701552	6624458
ROH34	16				44725782	44936271	210489
ROH35	17				73586997	75132928	1545931
ROH36	18				59045210	59641391	596181
ROH37	19	45995134	48022931	2027797
ROH38	20							4547590	5017896	470306
ROH39	21				553308	2582027	2028719	20065	2741767	2721702
ROH40	23				43444	1858339	1814895	43444	1310624	1267180
ROH41	23							25669376	26742222	1072846
ROH42	25	817031	2827677	2010646
ROH43	27				5122449	6250375	1127926
ROH44	29				38674660	39576927	902267

## Sheet: Table S3
Table S3
List of CNVRs in all the three breeds
Breed	Software	Chromosome	Start	End	Length (bp)	Copy State
Braunvieh	PennCNV	1	3726245	3740235	13990	Gain
Braunvieh	PennCNV	1	6312458	6324488	12030	Both
Braunvieh	PennCNV	1	11763666	11767713	4047	Loss
Braunvieh	PennCNV	1	15985548	15996018	10470	Gain
Braunvieh	PennCNV	1	17056540	17071520	14980	Loss
Braunvieh	PennCNV	1	25205821	25221464	15643	Loss
Braunvieh	PennCNV	1	27072549	27082347	9798	Loss
Braunvieh	PennCNV	1	30060642	30079818	19176	Loss
Braunvieh	PennCNV	1	31120089	31144199	24110	Loss
Braunvieh	PennCNV	1	37625474	37678201	52727	Loss
Braunvieh	PennCNV	1	40923260	40986370	63110	Loss
Braunvieh	PennCNV	1	42116347	42133194	16847	Loss
Braunvieh	PennCNV	1	43142253	43166528	24275	Loss
Braunvieh	PennCNV	1	44235900	44245035	9135	Loss
Braunvieh	PennCNV	1	45151561	45192426	40865	Loss
Braunvieh	PennCNV	1	46644048	46668510	24462	Loss
Braunvieh	PennCNV	1	70757424	70781667	24243	Both
Braunvieh	PennCNV	1	75987278	76045397	58119	Loss
Braunvieh	PennCNV	1	81911375	81938989	27614	Gain
Braunvieh	PennCNV	1	133243083	133250621	7538	Both
Braunvieh	PennCNV	1	142540283	142543854	3571	Gain
Braunvieh	PennCNV	2	27365813	28046681	680868	Gain
Braunvieh	PennCNV	2	36460912	36483235	22323	Gain
Braunvieh	PennCNV	2	36775192	37210549	435357	Loss
Braunvieh	PennCNV	2	46477034	46485436	8402	Loss
Braunvieh	PennCNV	2	49327887	49337028	9141	Loss
Braunvieh	PennCNV	2	63873059	64035031	161972	Gain
Braunvieh	PennCNV	2	75472312	75475758	3446	Loss
Braunvieh	PennCNV	2	98480344	98490521	10177	Gain
Braunvieh	PennCNV	2	104883862	105011773	127911	Both
Braunvieh	PennCNV	2	114409472	114421613	12141	Loss
Braunvieh	PennCNV	2	115322601	115354397	31796	Loss
Braunvieh	PennCNV	2	124330343	124394326	63983	Loss
Braunvieh	PennCNV	2	136151497	136199565	48068	Loss
Braunvieh	PennCNV	2	136254906	136304823	49917	Loss
Braunvieh	PennCNV	2	136382758	136435702	52944	Loss
Braunvieh	PennCNV	3	20966800	21004447	37647	Gain
Braunvieh	PennCNV	3	50167465	50188620	21155	Loss
Braunvieh	PennCNV	3	53625840	53628690	2850	Loss
Braunvieh	PennCNV	3	91038851	91047310	8459	Loss
Braunvieh	PennCNV	3	93088099	93156163	68064	Loss
Braunvieh	PennCNV	3	97034615	97049900	15285	Loss
Braunvieh	PennCNV	3	105711958	105720505	8547	Loss
Braunvieh	PennCNV	3	112899946	112929724	29778	Loss
Braunvieh	PennCNV	3	119752388	119762038	9650	Loss
Braunvieh	PennCNV	3	119899662	119923307	23645	Gain
Braunvieh	PennCNV	3	120552193	120710700	158507	Loss
Braunvieh	PennCNV	4	6094	165483	159389	Loss
Braunvieh	PennCNV	4	2825455	2845004	19549	Loss
Braunvieh	PennCNV	4	6245879	6459967	214088	Gain
Braunvieh	PennCNV	4	66013568	66027971	14403	Gain
Braunvieh	PennCNV	4	66494431	66877722	383291	Gain
Braunvieh	PennCNV	4	73676903	73789953	113050	Loss
Braunvieh	PennCNV	4	83432035	83444012	11977	Gain
Braunvieh	PennCNV	4	83936446	83942707	6261	Loss
Braunvieh	PennCNV	4	85699096	85744797	45701	Loss
Braunvieh	PennCNV	4	85857600	85888064	30464	Loss
Braunvieh	PennCNV	4	107237913	107246504	8591	Gain
Braunvieh	PennCNV	4	108488499	108491595	3096	Loss
Braunvieh	PennCNV	4	109085439	109098126	12687	Gain
Braunvieh	PennCNV	4	113729266	113745581	16315	Gain
Braunvieh	PennCNV	5	4520002	4531901	11899	Loss
Braunvieh	PennCNV	5	8270443	8274261	3818	Gain
Braunvieh	PennCNV	5	13039805	13054388	14583	Loss
Braunvieh	PennCNV	5	41734176	41751952	17776	Loss
Braunvieh	PennCNV	5	58021130	58049635	28505	Loss
Braunvieh	PennCNV	5	59018715	59189160	170445	Both
Braunvieh	PennCNV	5	59421039	59612173	191134	Loss
Braunvieh	PennCNV	5	70132826	70147601	14775	Loss
Braunvieh	PennCNV	5	74079827	74085915	6088	Gain
Braunvieh	PennCNV	5	107727547	107735624	8077	Gain
Braunvieh	PennCNV	5	117281795	117631559	349764	Both
Braunvieh	PennCNV	5	117938671	118081228	142557	Loss
Braunvieh	PennCNV	5	119318618	119335025	16407	Loss
Braunvieh	PennCNV	5	119723733	119729902	6169	Loss
Braunvieh	PennCNV	5	119741068	119761233	20165	Loss
Braunvieh	PennCNV	5	119772706	119820680	47974	Loss
Braunvieh	PennCNV	5	120183645	120243840	60195	Loss
Braunvieh	PennCNV	5	120295070	120318324	23254	Loss
Braunvieh	PennCNV	6	375699	511170	135471	Gain
Braunvieh	PennCNV	6	1074664	1099297	24633	Loss
Braunvieh	PennCNV	6	7463583	7489700	26117	Loss
Braunvieh	PennCNV	6	12846571	12856335	9764	Loss
Braunvieh	PennCNV	6	75472246	75505552	33306	Loss
Braunvieh	PennCNV	6	81533088	81540904	7816	Loss
Braunvieh	PennCNV	7	10880	273563	262683	Both
Braunvieh	PennCNV	7	1260258	1403258	143000	Gain
Braunvieh	PennCNV	7	2789408	2797066	7658	Gain
Braunvieh	PennCNV	7	10225525	10247764	22239	Loss
Braunvieh	PennCNV	7	18518171	18566035	47864	Gain
Braunvieh	PennCNV	7	23837165	23846696	9531	Gain
Braunvieh	PennCNV	7	29569259	29635023	65764	Loss
Braunvieh	PennCNV	7	43077701	43159833	82132	Gain
Braunvieh	PennCNV	7	43292715	43330896	38181	Gain
Braunvieh	PennCNV	7	43529725	43596454	66729	Loss
Braunvieh	PennCNV	7	47688846	47708000	19154	Loss
Braunvieh	PennCNV	7	53944893	53947702	2809	Gain
Braunvieh	PennCNV	7	87113645	87133023	19378	Loss
Braunvieh	PennCNV	7	98502599	98508931	6332	Loss
Braunvieh	PennCNV	7	99113453	99116654	3201	Loss
Braunvieh	PennCNV	7	107719580	107737643	18063	Loss
Braunvieh	PennCNV	8	3101470	3116170	14700	Loss
Braunvieh	PennCNV	8	12440991	12498395	57404	Both
Braunvieh	PennCNV	8	32961137	32968374	7237	Loss
Braunvieh	PennCNV	8	93154633	93156158	1525	Loss
Braunvieh	PennCNV	8	95919848	96030824	110976	Loss
Braunvieh	PennCNV	8	96129918	96187327	57409	Loss
Braunvieh	PennCNV	9	2611482	2626145	14663	Loss
Braunvieh	PennCNV	9	5610931	5639103	28172	Gain
Braunvieh	PennCNV	9	6957827	6977472	19645	Loss
Braunvieh	PennCNV	9	13985299	13992239	6940	Loss
Braunvieh	PennCNV	9	30932163	30972803	40640	Loss
Braunvieh	PennCNV	9	40769599	40853693	84094	Gain
Braunvieh	PennCNV	9	63928374	63933005	4631	Loss
Braunvieh	PennCNV	9	67200458	67218614	18156	Loss
Braunvieh	PennCNV	9	69521657	69536017	14360	Gain
Braunvieh	PennCNV	9	79358341	79395839	37498	Loss
Braunvieh	PennCNV	9	88558239	88563215	4976	Gain
Braunvieh	PennCNV	9	97347618	97357043	9425	Loss
Braunvieh	PennCNV	10	2327856	2343720	15864	Loss
Braunvieh	PennCNV	10	3493506	3502371	8865	Loss
Braunvieh	PennCNV	10	7348376	7354786	6410	Gain
Braunvieh	PennCNV	10	9175612	9183041	7429	Loss
Braunvieh	PennCNV	10	23319458	23854403	534945	Both
Braunvieh	PennCNV	10	24766755	24998515	231760	Loss
Braunvieh	PennCNV	10	25129328	25140684	11356	Loss
Braunvieh	PennCNV	10	27061809	27095664	33855	Loss
Braunvieh	PennCNV	10	41580124	41595553	15429	Loss
Braunvieh	PennCNV	10	46304777	46336313	31536	Loss
Braunvieh	PennCNV	10	55401363	55408341	6978	Loss
Braunvieh	PennCNV	10	60195930	60214713	18783	Loss
Braunvieh	PennCNV	10	90677423	90686795	9372	Loss
Braunvieh	PennCNV	10	101686578	101696488	9910	Gain
Braunvieh	PennCNV	11	17341756	17406557	64801	Loss
Braunvieh	PennCNV	11	75666032	75682226	16194	Loss
Braunvieh	PennCNV	11	84755633	84801194	45561	Loss
Braunvieh	PennCNV	11	96684986	96758826	73840	Loss
Braunvieh	PennCNV	11	104568233	104633267	65034	Loss
Braunvieh	PennCNV	11	105557304	105584350	27046	Gain
Braunvieh	PennCNV	11	106080185	106095702	15517	Loss
Braunvieh	PennCNV	11	106245832	106361147	115315	Gain
Braunvieh	PennCNV	11	107200389	107282960	82571	Loss
Braunvieh	PennCNV	12	536294	602363	66069	Both
Braunvieh	PennCNV	12	1081229	1094220	12991	Loss
Braunvieh	PennCNV	12	5808043	5835388	27345	Loss
Braunvieh	PennCNV	12	6277829	6287574	9745	Loss
Braunvieh	PennCNV	12	10028559	10073042	44483	Loss
Braunvieh	PennCNV	12	32054331	32182960	128629	Gain
Braunvieh	PennCNV	12	35739031	35760005	20974	Gain
Braunvieh	PennCNV	12	41821603	41833749	12146	Loss
Braunvieh	PennCNV	12	44599095	44612454	13359	Loss
Braunvieh	PennCNV	12	45534992	45560196	25204	Loss
Braunvieh	PennCNV	12	48728572	48749479	20907	Loss
Braunvieh	PennCNV	12	58071071	58426901	355830	Loss
Braunvieh	PennCNV	12	59595518	59626543	31025	Loss
Braunvieh	PennCNV	12	61375612	61395297	19685	Loss
Braunvieh	PennCNV	12	61852353	61861424	9071	Gain
Braunvieh	PennCNV	12	63362540	63390470	27930	Loss
Braunvieh	PennCNV	12	67009358	67034059	24701	Loss
Braunvieh	PennCNV	12	67537603	67576208	38605	Loss
Braunvieh	PennCNV	12	70492340	70620665	128325	Loss
Braunvieh	PennCNV	12	71032212	72042304	1010092	Both
Braunvieh	PennCNV	12	72174261	72264806	90545	Loss
Braunvieh	PennCNV	12	72432362	73779660	1347298	Both
Braunvieh	PennCNV	12	74327005	75391198	1064193	Both
Braunvieh	PennCNV	12	75462926	76154619	691693	Both
Braunvieh	PennCNV	12	82145713	82215811	70098	Loss
Braunvieh	PennCNV	13	5135656	5163722	28066	Loss
Braunvieh	PennCNV	13	6079164	6108096	28932	Loss
Braunvieh	PennCNV	13	43656792	43663286	6494	Gain
Braunvieh	PennCNV	13	43891359	43896069	4710	Gain
Braunvieh	PennCNV	13	51889305	51944399	55094	Loss
Braunvieh	PennCNV	13	53938383	53982995	44612	Loss
Braunvieh	PennCNV	13	57165083	57195066	29983	Gain
Braunvieh	PennCNV	14	1801116	2089613	288497	Loss
Braunvieh	PennCNV	14	2241832	2264522	22690	Loss
Braunvieh	PennCNV	14	2306572	2371917	65345	Loss
Braunvieh	PennCNV	14	48454835	48463465	8630	Loss
Braunvieh	PennCNV	14	54123999	54126508	2509	Loss
Braunvieh	PennCNV	14	78332048	78386690	54642	Loss
Braunvieh	PennCNV	15	678357	695497	17140	Gain
Braunvieh	PennCNV	15	2551329	2576339	25010	Gain
Braunvieh	PennCNV	15	20057061	20059474	2413	Loss
Braunvieh	PennCNV	15	25522117	25531393	9276	Loss
Braunvieh	PennCNV	15	47909595	47946424	36829	Gain
Braunvieh	PennCNV	15	76928076	76953146	25070	Gain
Braunvieh	PennCNV	15	80275724	80299279	23555	Gain
Braunvieh	PennCNV	15	80529996	80831076	301080	Both
Braunvieh	PennCNV	15	81301329	81310997	9668	Both
Braunvieh	PennCNV	15	85199311	85264648	65337	Gain
Braunvieh	PennCNV	16	5738701	5768249	29548	Loss
Braunvieh	PennCNV	16	13753255	13755054	1799	Loss
Braunvieh	PennCNV	16	15350084	15359349	9265	Loss
Braunvieh	PennCNV	16	34664333	34675057	10724	Loss
Braunvieh	PennCNV	16	36807713	36817218	9505	Loss
Braunvieh	PennCNV	16	37324151	37328127	3976	Gain
Braunvieh	PennCNV	16	62134743	62193106	58363	Gain
Braunvieh	PennCNV	16	63559705	63566418	6713	Loss
Braunvieh	PennCNV	16	69756940	69774641	17701	Loss
Braunvieh	PennCNV	17	534189	2413871	1879682	Gain
Braunvieh	PennCNV	17	30821541	30832741	11200	Loss
Braunvieh	PennCNV	17	34352319	34354178	1859	Loss
Braunvieh	PennCNV	17	47599108	47613607	14499	Loss
Braunvieh	PennCNV	17	73841839	73853171	11332	Loss
Braunvieh	PennCNV	17	74816294	75108593	292299	Loss
Braunvieh	PennCNV	18	9741999	9746255	4256	Loss
Braunvieh	PennCNV	18	13365474	13430591	65117	Gain
Braunvieh	PennCNV	18	15049772	15054433	4661	Loss
Braunvieh	PennCNV	18	15765906	15775541	9635	Loss
Braunvieh	PennCNV	18	20360491	20362664	2173	Loss
Braunvieh	PennCNV	18	21716132	21779289	63157	Loss
Braunvieh	PennCNV	18	40705639	40745455	39816	Loss
Braunvieh	PennCNV	18	53398950	53447173	48223	Loss
Braunvieh	PennCNV	18	57276596	57302574	25978	Loss
Braunvieh	PennCNV	18	60194386	60211002	16616	Gain
Braunvieh	PennCNV	18	61781777	61835029	53252	Loss
Braunvieh	PennCNV	18	61963721	61972992	9271	Loss
Braunvieh	PennCNV	18	64919064	64922303	3239	Loss
Braunvieh	PennCNV	18	65419972	65447640	27668	Loss
Braunvieh	PennCNV	18	65823536	65999195	175659	Loss
Braunvieh	PennCNV	19	373928	481550	107622	Loss
Braunvieh	PennCNV	19	2544638	2569916	25278	Both
Braunvieh	PennCNV	19	2698613	2718995	20382	Loss
Braunvieh	PennCNV	19	9890370	9964662	74292	Gain
Braunvieh	PennCNV	19	14601910	14606603	4693	Loss
Braunvieh	PennCNV	19	16927828	16973373	45545	Loss
Braunvieh	PennCNV	19	19076956	19181132	104176	Loss
Braunvieh	PennCNV	19	26775126	26827190	52064	Both
Braunvieh	PennCNV	19	28342107	28361552	19445	Loss
Braunvieh	PennCNV	19	34976722	35122155	145433	Loss
Braunvieh	PennCNV	19	35241630	35286010	44380	Loss
Braunvieh	PennCNV	19	35776396	35989377	212981	Loss
Braunvieh	PennCNV	19	36158014	36187954	29940	Loss
Braunvieh	PennCNV	19	36286537	36429854	143317	Both
Braunvieh	PennCNV	19	40068278	40096940	28662	Loss
Braunvieh	PennCNV	19	40137299	40202188	64889	Gain
Braunvieh	PennCNV	19	40254915	40387706	132791	Loss
Braunvieh	PennCNV	19	45139119	45174544	35425	Loss
Braunvieh	PennCNV	19	45833055	45859905	26850	Loss
Braunvieh	PennCNV	19	46096253	46221220	124967	Both
Braunvieh	PennCNV	19	47048084	47236540	188456	Both
Braunvieh	PennCNV	19	47366560	47407572	41012	Both
Braunvieh	PennCNV	19	48099875	48309588	209713	Both
Braunvieh	PennCNV	19	48701756	48713583	11827	Loss
Braunvieh	PennCNV	19	48801884	48807719	5835	Loss
Braunvieh	PennCNV	19	49016731	49150856	134125	Loss
Braunvieh	PennCNV	19	49247372	49307399	60027	Loss
Braunvieh	PennCNV	19	49666501	49688689	22188	Loss
Braunvieh	PennCNV	19	49758278	49784054	25776	Loss
Braunvieh	PennCNV	19	50575148	50636537	61389	Loss
Braunvieh	PennCNV	19	51113424	51333432	220008	Loss
Braunvieh	PennCNV	19	51723540	51782744	59204	Loss
Braunvieh	PennCNV	19	52497436	52600860	103424	Loss
Braunvieh	PennCNV	19	52993702	53104367	110665	Loss
Braunvieh	PennCNV	19	56403275	56484276	81001	Both
Braunvieh	PennCNV	19	63230235	63262941	32706	Gain
Braunvieh	PennCNV	19	63885146	64044783	159637	Loss
Braunvieh	PennCNV	20	37231561	37260097	28536	Loss
Braunvieh	PennCNV	20	53105851	53115549	9698	Gain
Braunvieh	PennCNV	21	552613	599530	46917	Loss
Braunvieh	PennCNV	21	1082941	1300053	217112	Loss
Braunvieh	PennCNV	21	3882864	3896865	14001	Loss
Braunvieh	PennCNV	21	20097872	20143245	45373	Loss
Braunvieh	PennCNV	21	20813142	20833106	19964	Loss
Braunvieh	PennCNV	21	46268195	46304468	36273	Loss
Braunvieh	PennCNV	21	47857235	47862491	5256	Loss
Braunvieh	PennCNV	21	52308530	52329035	20505	Loss
Braunvieh	PennCNV	21	54185150	54196002	10852	Loss
Braunvieh	PennCNV	21	71350920	71364054	13134	Loss
Braunvieh	PennCNV	22	50372683	50456817	84134	Loss
Braunvieh	PennCNV	22	61237680	61342774	105094	Loss
Braunvieh	PennCNV	23	11812761	11836526	23765	Gain
Braunvieh	PennCNV	23	18294438	18307738	13300	Loss
Braunvieh	PennCNV	23	25329895	25443589	113694	Both
Braunvieh	PennCNV	23	25669376	25881173	211797	Loss
Braunvieh	PennCNV	23	27849149	27880661	31512	Gain
Braunvieh	PennCNV	23	28469826	28494393	24567	Loss
Braunvieh	PennCNV	23	29041704	29079916	38212	Both
Braunvieh	PennCNV	23	30441844	30443202	1358	Loss
Braunvieh	PennCNV	23	35566555	35584577	18022	Both
Braunvieh	PennCNV	23	37065434	37071377	5943	Loss
Braunvieh	PennCNV	23	52363277	52458364	95087	Both
Braunvieh	PennCNV	24	54398	392019	337621	Loss
Braunvieh	PennCNV	24	21071943	21086844	14901	Loss
Braunvieh	PennCNV	24	30102158	30148869	46711	Loss
Braunvieh	PennCNV	24	52374120	52388202	14082	Loss
Braunvieh	PennCNV	25	461233	629048	167815	Gain
Braunvieh	PennCNV	25	658667	692031	33364	Gain
Braunvieh	PennCNV	25	1011670	1136413	124743	Gain
Braunvieh	PennCNV	25	1365841	1421106	55265	Both
Braunvieh	PennCNV	25	1481116	1733311	252195	Loss
Braunvieh	PennCNV	25	1822299	1854547	32248	Loss
Braunvieh	PennCNV	25	2043252	2157940	114688	Loss
Braunvieh	PennCNV	25	19731197	19758333	27136	Gain
Braunvieh	PennCNV	25	34899639	34910974	11335	Loss
Braunvieh	PennCNV	25	36094816	36119122	24306	Both
Braunvieh	PennCNV	25	37211216	37286534	75318	Gain
Braunvieh	PennCNV	25	38949613	38985593	35980	Loss
Braunvieh	PennCNV	25	40437343	40452853	15510	Gain
Braunvieh	PennCNV	25	41264590	41348788	84198	Loss
Braunvieh	PennCNV	26	22955460	22962858	7398	Loss
Braunvieh	PennCNV	26	23668006	23690266	22260	Gain
Braunvieh	PennCNV	26	24667660	24681812	14152	Loss
Braunvieh	PennCNV	28	45676164	45870946	194782	Loss
Braunvieh	PennCNV	29	49922377	50406176	483799	Loss
Braunvieh	PennCNV	29	51396010	51502868	106858	Loss
Grauvieh	PennCNV	1	6312458	6326544	14086	Loss
Grauvieh	PennCNV	1	11790217	11824251	34034	Loss
Grauvieh	PennCNV	1	12991828	13025203	33375	Loss
Grauvieh	PennCNV	1	13739560	13773835	34275	Loss
Grauvieh	PennCNV	1	14658833	14802533	143700	Loss
Grauvieh	PennCNV	1	18737281	19145160	407879	Loss
Grauvieh	PennCNV	1	20685638	20751149	65511	Loss
Grauvieh	PennCNV	1	22738695	22792553	53858	Loss
Grauvieh	PennCNV	1	26276813	26289282	12469	Loss
Grauvieh	PennCNV	1	26598678	26616013	17335	Loss
Grauvieh	PennCNV	1	27460341	27471434	11093	Loss
Grauvieh	PennCNV	1	31699505	31819408	119903	Loss
Grauvieh	PennCNV	1	33243004	33316680	73676	Loss
Grauvieh	PennCNV	1	33748079	33770038	21959	Loss
Grauvieh	PennCNV	1	37641762	37678201	36439	Loss
Grauvieh	PennCNV	1	38898759	38945664	46905	Loss
Grauvieh	PennCNV	1	39074030	39177352	103322	Loss
Grauvieh	PennCNV	1	41552252	41667212	114960	Loss
Grauvieh	PennCNV	1	42119177	42190693	71516	Loss
Grauvieh	PennCNV	1	42253560	42281663	28103	Loss
Grauvieh	PennCNV	1	44897300	44950270	52970	Loss
Grauvieh	PennCNV	1	46159469	46853955	694486	Loss
Grauvieh	PennCNV	1	46920841	46935763	14922	Loss
Grauvieh	PennCNV	1	48414894	48510777	95883	Loss
Grauvieh	PennCNV	1	53349402	53374645	25243	Loss
Grauvieh	PennCNV	1	53383775	53569724	185949	Loss
Grauvieh	PennCNV	1	58954884	59037885	83001	Loss
Grauvieh	PennCNV	1	63938902	63965932	27030	Loss
Grauvieh	PennCNV	1	65307312	65350161	42849	Loss
Grauvieh	PennCNV	1	65658050	65736006	77956	Loss
Grauvieh	PennCNV	1	68353295	68375822	22527	Loss
Grauvieh	PennCNV	1	69015486	69102437	86951	Loss
Grauvieh	PennCNV	1	69412686	69583758	171072	Loss
Grauvieh	PennCNV	1	69774534	70212968	438434	Loss
Grauvieh	PennCNV	1	75993310	76065160	71850	Loss
Grauvieh	PennCNV	1	83590335	83733826	143491	Loss
Grauvieh	PennCNV	1	92811163	92834591	23428	Loss
Grauvieh	PennCNV	1	105103301	105137775	34474	Loss
Grauvieh	PennCNV	1	124392389	124420643	28254	Loss
Grauvieh	PennCNV	1	132310481	132331882	21401	Loss
Grauvieh	PennCNV	1	132340097	132538714	198617	Loss
Grauvieh	PennCNV	1	145684851	145772765	87914	Loss
Grauvieh	PennCNV	1	145842336	145873011	30675	Loss
Grauvieh	PennCNV	1	145956925	145975934	19009	Loss
Grauvieh	PennCNV	1	147337528	147400885	63357	Loss
Grauvieh	PennCNV	1	148467848	148491399	23551	Loss
Grauvieh	PennCNV	2	361303	404239	42936	Loss
Grauvieh	PennCNV	2	703046	784712	81666	Loss
Grauvieh	PennCNV	2	12172750	12175242	2492	Loss
Grauvieh	PennCNV	2	20026955	20045106	18151	Loss
Grauvieh	PennCNV	2	33001213	33172993	171780	Loss
Grauvieh	PennCNV	2	36999816	37039659	39843	Loss
Grauvieh	PennCNV	2	45585488	45591707	6219	Loss
Grauvieh	PennCNV	2	46477034	46485436	8402	Loss
Grauvieh	PennCNV	2	47718922	47738613	19691	Gain
Grauvieh	PennCNV	2	48073959	48125231	51272	Loss
Grauvieh	PennCNV	2	48154122	48188052	33930	Loss
Grauvieh	PennCNV	2	51298371	51404753	106382	Loss
Grauvieh	PennCNV	2	54418622	54453692	35070	Loss
Grauvieh	PennCNV	2	54894429	54951611	57182	Loss
Grauvieh	PennCNV	2	55636284	55683866	47582	Loss
Grauvieh	PennCNV	2	56690495	56709086	18591	Loss
Grauvieh	PennCNV	2	57807058	57891031	83973	Loss
Grauvieh	PennCNV	2	79474217	79497709	23492	Loss
Grauvieh	PennCNV	2	82198830	82218423	19593	Loss
Grauvieh	PennCNV	2	104825968	105013759	187791	Loss
Grauvieh	PennCNV	2	119143990	119179256	35266	Gain
Grauvieh	PennCNV	2	131509729	131605519	95790	Loss
Grauvieh	PennCNV	2	135553033	135650920	97887	Loss
Grauvieh	PennCNV	2	136146073	136199565	53492	Loss
Grauvieh	PennCNV	2	136461239	136703562	242323	Loss
Grauvieh	PennCNV	3	632986	737817	104831	Loss
Grauvieh	PennCNV	3	7638837	7663313	24476	Gain
Grauvieh	PennCNV	3	12257818	12329835	72017	Loss
Grauvieh	PennCNV	3	17330725	17339204	8479	Loss
Grauvieh	PennCNV	3	19431182	19528383	97201	Loss
Grauvieh	PennCNV	3	37958597	38026018	67421	Loss
Grauvieh	PennCNV	3	43390032	43449962	59930	Loss
Grauvieh	PennCNV	3	43476846	43510028	33182	Loss
Grauvieh	PennCNV	3	46823567	46855572	32005	Loss
Grauvieh	PennCNV	3	54541000	54820361	279361	Gain
Grauvieh	PennCNV	3	57574682	57660112	85430	Loss
Grauvieh	PennCNV	3	100221300	100263241	41941	Loss
Grauvieh	PennCNV	3	105711958	105720505	8547	Loss
Grauvieh	PennCNV	3	110065156	110084448	19292	Loss
Grauvieh	PennCNV	3	112899946	112922761	22815	Loss
Grauvieh	PennCNV	3	119459824	119483708	23884	Loss
Grauvieh	PennCNV	3	119762515	119769830	7315	Loss
Grauvieh	PennCNV	3	120142878	120162768	19890	Loss
Grauvieh	PennCNV	3	120307675	120611286	303611	Loss
Grauvieh	PennCNV	3	120650421	120715195	64774	Loss
Grauvieh	PennCNV	3	121237682	121374825	137143	Loss
Grauvieh	PennCNV	4	758931	767164	8233	Gain
Grauvieh	PennCNV	4	5750154	5785559	35405	Loss
Grauvieh	PennCNV	4	6232064	6471756	239692	Gain
Grauvieh	PennCNV	4	26560740	26586504	25764	Loss
Grauvieh	PennCNV	4	34541149	34583721	42572	Loss
Grauvieh	PennCNV	4	43464261	43487686	23425	Loss
Grauvieh	PennCNV	4	46154398	46245052	90654	Loss
Grauvieh	PennCNV	4	46878940	46890706	11766	Loss
Grauvieh	PennCNV	4	48819329	48877000	57671	Loss
Grauvieh	PennCNV	4	59156453	59242378	85925	Loss
Grauvieh	PennCNV	4	60901032	60942029	40997	Loss
Grauvieh	PennCNV	4	61205204	61386961	181757	Loss
Grauvieh	PennCNV	4	66017706	66027971	10265	Gain
Grauvieh	PennCNV	4	74146122	74157018	10896	Loss
Grauvieh	PennCNV	4	74415919	74429605	13686	Gain
Grauvieh	PennCNV	4	77424597	77463883	39286	Loss
Grauvieh	PennCNV	4	83429553	83452740	23187	Gain
Grauvieh	PennCNV	4	106061667	106084575	22908	Gain
Grauvieh	PennCNV	4	106140003	106142458	2455	Gain
Grauvieh	PennCNV	4	108134382	108171759	37377	Gain
Grauvieh	PennCNV	5	1374641	1377250	2609	Gain
Grauvieh	PennCNV	5	4520002	4531901	11899	Loss
Grauvieh	PennCNV	5	5620471	5644397	23926	Loss
Grauvieh	PennCNV	5	8270443	8274261	3818	Gain
Grauvieh	PennCNV	5	9762365	9933020	170655	Gain
Grauvieh	PennCNV	5	25760934	25797511	36577	Loss
Grauvieh	PennCNV	5	25804890	25836651	31761	Loss
Grauvieh	PennCNV	5	26301071	26341865	40794	Loss
Grauvieh	PennCNV	5	41601867	41611682	9815	Loss
Grauvieh	PennCNV	5	55911091	56060403	149312	Loss
Grauvieh	PennCNV	5	57999102	58021130	22028	Gain
Grauvieh	PennCNV	5	58386640	58437372	50732	Loss
Grauvieh	PennCNV	5	59018715	59207218	188503	Loss
Grauvieh	PennCNV	5	59871702	59905836	34134	Loss
Grauvieh	PennCNV	5	74939227	75058200	118973	Gain
Grauvieh	PennCNV	5	79840245	79906442	66197	Loss
Grauvieh	PennCNV	5	99542086	99577125	35039	Loss
Grauvieh	PennCNV	5	103280697	103405395	124698	Both
Grauvieh	PennCNV	5	107644205	107653887	9682	Loss
Grauvieh	PennCNV	5	113519483	113846897	327414	Loss
Grauvieh	PennCNV	5	115686942	115780777	93835	Loss
Grauvieh	PennCNV	5	116098925	116194236	95311	Loss
Grauvieh	PennCNV	5	116911486	117096900	185414	Loss
Grauvieh	PennCNV	5	117281795	117824430	542635	Both
Grauvieh	PennCNV	5	119408760	119465500	56740	Loss
Grauvieh	PennCNV	5	119519065	119687257	168192	Loss
Grauvieh	PennCNV	5	119711474	119729902	18428	Loss
Grauvieh	PennCNV	5	119751327	119761233	9906	Loss
Grauvieh	PennCNV	5	119772706	120150726	378020	Loss
Grauvieh	PennCNV	5	120295070	120314485	19415	Loss
Grauvieh	PennCNV	5	120740996	120747261	6265	Loss
Grauvieh	PennCNV	5	121080489	121183174	102685	Loss
Grauvieh	PennCNV	6	108414	566676	458262	Loss
Grauvieh	PennCNV	6	782857	855397	72540	Loss
Grauvieh	PennCNV	6	1074664	1110222	35558	Loss
Grauvieh	PennCNV	6	1314682	1405878	91196	Loss
Grauvieh	PennCNV	6	3089088	3099852	10764	Loss
Grauvieh	PennCNV	6	3190744	3217181	26437	Gain
Grauvieh	PennCNV	6	3817199	3841578	24379	Loss
Grauvieh	PennCNV	6	7463583	7503061	39478	Loss
Grauvieh	PennCNV	6	9336376	9380908	44532	Loss
Grauvieh	PennCNV	6	11252765	11307882	55117	Loss
Grauvieh	PennCNV	6	12846571	12856335	9764	Loss
Grauvieh	PennCNV	6	28263949	28294751	30802	Loss
Grauvieh	PennCNV	6	33113270	33131396	18126	Loss
Grauvieh	PennCNV	6	34344151	34492386	148235	Loss
Grauvieh	PennCNV	6	35163877	35225753	61876	Loss
Grauvieh	PennCNV	6	47645228	47664485	19257	Loss
Grauvieh	PennCNV	6	48061074	48095852	34778	Loss
Grauvieh	PennCNV	6	50660304	50700738	40434	Loss
Grauvieh	PennCNV	6	52104295	52232030	127735	Loss
Grauvieh	PennCNV	6	54601170	54745938	144768	Loss
Grauvieh	PennCNV	6	55697300	55840650	143350	Loss
Grauvieh	PennCNV	6	61123177	61153529	30352	Loss
Grauvieh	PennCNV	6	65658844	65668263	9419	Loss
Grauvieh	PennCNV	6	66197452	66228416	30964	Gain
Grauvieh	PennCNV	6	67049861	67064849	14988	Loss
Grauvieh	PennCNV	6	68316330	68327026	10696	Gain
Grauvieh	PennCNV	6	74978379	75124702	146323	Loss
Grauvieh	PennCNV	6	78746026	78789417	43391	Loss
Grauvieh	PennCNV	6	81530606	81565587	34981	Loss
Grauvieh	PennCNV	6	86886366	86942912	56546	Loss
Grauvieh	PennCNV	6	97330391	97349211	18820	Loss
Grauvieh	PennCNV	6	107214281	107285912	71631	Loss
Grauvieh	PennCNV	6	107646665	107693320	46655	Loss
Grauvieh	PennCNV	6	108857288	108875368	18080	Loss
Grauvieh	PennCNV	6	108971589	109147066	175477	Loss
Grauvieh	PennCNV	6	109353981	109714223	360242	Both
Grauvieh	PennCNV	6	117103908	117113689	9781	Loss
Grauvieh	PennCNV	6	119352991	119360261	7270	Loss
Grauvieh	PennCNV	7	10880	273563	262683	Loss
Grauvieh	PennCNV	7	671309	683359	12050	Loss
Grauvieh	PennCNV	7	989660	1002240	12580	Loss
Grauvieh	PennCNV	7	1127439	1224474	97035	Loss
Grauvieh	PennCNV	7	1260258	1422115	161857	Both
Grauvieh	PennCNV	7	1451520	1507746	56226	Loss
Grauvieh	PennCNV	7	2591834	2603400	11566	Loss
Grauvieh	PennCNV	7	3022250	3069070	46820	Loss
Grauvieh	PennCNV	7	3183775	3208817	25042	Loss
Grauvieh	PennCNV	7	4522297	4575498	53201	Loss
Grauvieh	PennCNV	7	6299943	6322473	22530	Loss
Grauvieh	PennCNV	7	8064458	8111319	46861	Loss
Grauvieh	PennCNV	7	8218382	8250202	31820	Gain
Grauvieh	PennCNV	7	8437452	8532103	94651	Loss
Grauvieh	PennCNV	7	9160492	9264472	103980	Loss
Grauvieh	PennCNV	7	9771150	9776185	5035	Both
Grauvieh	PennCNV	7	10225525	10247764	22239	Loss
Grauvieh	PennCNV	7	10407511	10722414	314903	Both
Grauvieh	PennCNV	7	10874375	11087441	213066	Gain
Grauvieh	PennCNV	7	14065972	14115727	49755	Loss
Grauvieh	PennCNV	7	14863331	15053190	189859	Loss
Grauvieh	PennCNV	7	16450827	16477719	26892	Loss
Grauvieh	PennCNV	7	20337884	20382124	44240	Loss
Grauvieh	PennCNV	7	21267043	21518141	251098	Loss
Grauvieh	PennCNV	7	23813839	23846696	32857	Loss
Grauvieh	PennCNV	7	24129523	24149485	19962	Gain
Grauvieh	PennCNV	7	29573262	29627140	53878	Loss
Grauvieh	PennCNV	7	43271894	43330896	59002	Gain
Grauvieh	PennCNV	7	44830907	45279487	448580	Loss
Grauvieh	PennCNV	7	45388240	45402064	13824	Loss
Grauvieh	PennCNV	7	45581376	45658874	77498	Loss
Grauvieh	PennCNV	7	46777484	46791808	14324	Loss
Grauvieh	PennCNV	7	53944893	53947702	2809	Gain
Grauvieh	PennCNV	7	76752019	76753919	1900	Loss
Grauvieh	PennCNV	7	83784068	83810394	26326	Loss
Grauvieh	PennCNV	7	87452028	87471379	19351	Loss
Grauvieh	PennCNV	7	98712537	98721662	9125	Loss
Grauvieh	PennCNV	7	99113453	99116654	3201	Loss
Grauvieh	PennCNV	7	99201664	99275874	74210	Loss
Grauvieh	PennCNV	7	100714914	100857256	142342	Loss
Grauvieh	PennCNV	7	107719580	107737643	18063	Loss
Grauvieh	PennCNV	7	109787591	110203961	416370	Loss
Grauvieh	PennCNV	8	3217171	3247599	30428	Loss
Grauvieh	PennCNV	8	12451687	12498395	46708	Gain
Grauvieh	PennCNV	8	31039166	31076738	37572	Loss
Grauvieh	PennCNV	8	34543093	34661460	118367	Loss
Grauvieh	PennCNV	8	77374104	77497142	123038	Loss
Grauvieh	PennCNV	8	95919848	96030824	110976	Loss
Grauvieh	PennCNV	8	99881985	99921152	39167	Loss
Grauvieh	PennCNV	8	105178716	105195851	17135	Gain
Grauvieh	PennCNV	9	28755	640228	611473	Loss
Grauvieh	PennCNV	9	791053	851267	60214	Loss
Grauvieh	PennCNV	9	1385795	1573072	187277	Loss
Grauvieh	PennCNV	9	1888132	1928515	40383	Loss
Grauvieh	PennCNV	9	3224764	3310513	85749	Loss
Grauvieh	PennCNV	9	13915096	13922193	7097	Gain
Grauvieh	PennCNV	9	13985299	13992239	6940	Loss
Grauvieh	PennCNV	9	14743258	14776098	32840	Loss
Grauvieh	PennCNV	9	16287235	16344672	57437	Loss
Grauvieh	PennCNV	9	30932163	30972803	40640	Loss
Grauvieh	PennCNV	9	38193344	38199983	6639	Loss
Grauvieh	PennCNV	9	38362973	38374639	11666	Loss
Grauvieh	PennCNV	9	39435206	39451347	16141	Gain
Grauvieh	PennCNV	9	43960964	44016759	55795	Loss
Grauvieh	PennCNV	9	49236763	49306098	69335	Loss
Grauvieh	PennCNV	9	54730250	54778504	48254	Loss
Grauvieh	PennCNV	9	57303660	57412390	108730	Loss
Grauvieh	PennCNV	9	57792920	57837314	44394	Loss
Grauvieh	PennCNV	9	57959072	57970391	11319	Gain
Grauvieh	PennCNV	9	69527371	69536017	8646	Loss
Grauvieh	PennCNV	9	72889203	72896735	7532	Loss
Grauvieh	PennCNV	9	77390373	77403405	13032	Loss
Grauvieh	PennCNV	9	79748829	79767692	18863	Loss
Grauvieh	PennCNV	9	88558239	88563215	4976	Gain
Grauvieh	PennCNV	9	91234070	91338306	104236	Loss
Grauvieh	PennCNV	9	101664120	101924436	260316	Gain
Grauvieh	PennCNV	10	6268796	6288477	19681	Loss
Grauvieh	PennCNV	10	7347256	7355387	8131	Gain
Grauvieh	PennCNV	10	22386910	22407141	20231	Gain
Grauvieh	PennCNV	10	22647333	22919982	272649	Gain
Grauvieh	PennCNV	10	23651168	25297208	1646040	Both
Grauvieh	PennCNV	10	41584872	41596729	11857	Loss
Grauvieh	PennCNV	10	54243593	54328503	84910	Gain
Grauvieh	PennCNV	10	54557845	54649455	91610	Gain
Grauvieh	PennCNV	10	60195930	60201542	5612	Both
Grauvieh	PennCNV	10	63939052	63947314	8262	Gain
Grauvieh	PennCNV	10	77610454	77624566	14112	Loss
Grauvieh	PennCNV	10	89347981	89368068	20087	Loss
Grauvieh	PennCNV	11	14241827	14279025	37198	Loss
Grauvieh	PennCNV	11	54780548	54829330	48782	Loss
Grauvieh	PennCNV	11	57796903	57814916	18013	Loss
Grauvieh	PennCNV	11	76586236	76619224	32988	Gain
Grauvieh	PennCNV	11	86006314	86036402	30088	Loss
Grauvieh	PennCNV	11	103615735	103950560	334825	Loss
Grauvieh	PennCNV	11	103985002	104144206	159204	Loss
Grauvieh	PennCNV	11	104307579	104496081	188502	Loss
Grauvieh	PennCNV	11	104512712	104602257	89545	Loss
Grauvieh	PennCNV	11	104736088	104764859	28771	Loss
Grauvieh	PennCNV	11	105694813	106030953	336140	Loss
Grauvieh	PennCNV	11	106114402	106399415	285013	Loss
Grauvieh	PennCNV	11	106651060	106679852	28792	Loss
Grauvieh	PennCNV	11	107205272	107282960	77688	Loss
Grauvieh	PennCNV	12	6351	11691	5340	Loss
Grauvieh	PennCNV	12	76236	166654	90418	Loss
Grauvieh	PennCNV	12	536294	656896	120602	Loss
Grauvieh	PennCNV	12	1167394	1185172	17778	Loss
Grauvieh	PennCNV	12	11349772	11357171	7399	Loss
Grauvieh	PennCNV	12	18698390	18719527	21137	Loss
Grauvieh	PennCNV	12	29947950	29956206	8256	Loss
Grauvieh	PennCNV	12	32054331	32182960	128629	Loss
Grauvieh	PennCNV	12	37358859	37404027	45168	Loss
Grauvieh	PennCNV	12	42769193	42797339	28146	Loss
Grauvieh	PennCNV	12	42964295	43097164	132869	Loss
Grauvieh	PennCNV	12	44587873	44618920	31047	Loss
Grauvieh	PennCNV	12	47820904	47845445	24541	Loss
Grauvieh	PennCNV	12	48190451	48221716	31265	Loss
Grauvieh	PennCNV	12	49774328	50074342	300014	Loss
Grauvieh	PennCNV	12	50418019	50462658	44639	Loss
Grauvieh	PennCNV	12	56440779	56501527	60748	Loss
Grauvieh	PennCNV	12	57706441	57720361	13920	Loss
Grauvieh	PennCNV	12	58071071	58196807	125736	Loss
Grauvieh	PennCNV	12	59597003	59626543	29540	Loss
Grauvieh	PennCNV	12	60440670	60447082	6412	Gain
Grauvieh	PennCNV	12	60646198	60664504	18306	Loss
Grauvieh	PennCNV	12	61375612	61400506	24894	Loss
Grauvieh	PennCNV	12	61513185	61574386	61201	Loss
Grauvieh	PennCNV	12	63362540	63394839	32299	Loss
Grauvieh	PennCNV	12	66986616	67018062	31446	Loss
Grauvieh	PennCNV	12	67534138	67576208	42070	Loss
Grauvieh	PennCNV	12	69540419	69567868	27449	Gain
Grauvieh	PennCNV	12	70483913	72123747	1639834	Both
Grauvieh	PennCNV	12	72174261	72264806	90545	Loss
Grauvieh	PennCNV	12	72432362	74018916	1586554	Both
Grauvieh	PennCNV	12	74327005	75256383	929378	Loss
Grauvieh	PennCNV	12	75266781	75284908	18127	Gain
Grauvieh	PennCNV	12	75500319	76074162	573843	Both
Grauvieh	PennCNV	12	82144071	82215811	71740	Loss
Grauvieh	PennCNV	12	90146273	90179467	33194	Loss
Grauvieh	PennCNV	12	90423648	90515131	91483	Loss
Grauvieh	PennCNV	13	14361211	14370272	9061	Loss
Grauvieh	PennCNV	13	20727259	20798829	71570	Gain
Grauvieh	PennCNV	13	26080080	26097354	17274	Gain
Grauvieh	PennCNV	13	41051683	41080260	28577	Gain
Grauvieh	PennCNV	13	43656792	43771619	114827	Gain
Grauvieh	PennCNV	13	43891359	43940108	48749	Gain
Grauvieh	PennCNV	13	53938383	53982995	44612	Loss
Grauvieh	PennCNV	13	54587916	54614176	26260	Loss
Grauvieh	PennCNV	13	54720948	54842418	121470	Loss
Grauvieh	PennCNV	13	55016375	55117379	101004	Loss
Grauvieh	PennCNV	13	55409520	55428804	19284	Loss
Grauvieh	PennCNV	13	61562252	61572557	10305	Gain
Grauvieh	PennCNV	13	62651564	63153780	502216	Loss
Grauvieh	PennCNV	13	65255565	65285989	30424	Loss
Grauvieh	PennCNV	13	66179152	66366119	186967	Loss
Grauvieh	PennCNV	14	1480260	2118405	638145	Loss
Grauvieh	PennCNV	14	2178766	2201929	23163	Loss
Grauvieh	PennCNV	14	2241832	2468020	226188	Loss
Grauvieh	PennCNV	14	2826632	2916658	90026	Loss
Grauvieh	PennCNV	14	3006509	3041952	35443	Loss
Grauvieh	PennCNV	14	3114776	3129420	14644	Loss
Grauvieh	PennCNV	14	3477584	3759411	281827	Loss
Grauvieh	PennCNV	14	7872611	7897509	24898	Gain
Grauvieh	PennCNV	14	54812900	54824140	11240	Loss
Grauvieh	PennCNV	14	68095999	68137119	41120	Loss
Grauvieh	PennCNV	14	72446729	72451731	5002	Loss
Grauvieh	PennCNV	14	82499537	82625001	125464	Gain
Grauvieh	PennCNV	14	84548983	84578648	29665	Gain
Grauvieh	PennCNV	15	43737	941671	897934	Loss
Grauvieh	PennCNV	15	1305188	1463431	158243	Loss
Grauvieh	PennCNV	15	2021683	2060428	38745	Loss
Grauvieh	PennCNV	15	2220059	2450645	230586	Loss
Grauvieh	PennCNV	15	2551329	2576339	25010	Gain
Grauvieh	PennCNV	15	15764194	15773838	9644	Loss
Grauvieh	PennCNV	15	19906629	19971007	64378	Loss
Grauvieh	PennCNV	15	20050183	20064594	14411	Loss
Grauvieh	PennCNV	15	30467742	30514604	46862	Loss
Grauvieh	PennCNV	15	46805089	46838495	33406	Gain
Grauvieh	PennCNV	15	47993124	47998053	4929	Gain
Grauvieh	PennCNV	15	50375965	50416349	40384	Gain
Grauvieh	PennCNV	15	79071760	79115985	44225	Loss
Grauvieh	PennCNV	15	79498504	79525723	27219	Loss
Grauvieh	PennCNV	15	80266292	80299924	33632	Gain
Grauvieh	PennCNV	15	80597666	80795701	198035	Both
Grauvieh	PennCNV	15	84038466	84046192	7726	Loss
Grauvieh	PennCNV	15	84939710	84976250	36540	Gain
Grauvieh	PennCNV	15	84981909	85063817	81908	Both
Grauvieh	PennCNV	16	5581530	5768249	186719	Loss
Grauvieh	PennCNV	16	5846840	6125517	278677	Gain
Grauvieh	PennCNV	16	8411635	8422582	10947	Gain
Grauvieh	PennCNV	16	10859069	10975736	116667	Loss
Grauvieh	PennCNV	16	15066677	15124819	58142	Loss
Grauvieh	PennCNV	16	15146573	15243100	96527	Loss
Grauvieh	PennCNV	16	15757248	15767874	10626	Loss
Grauvieh	PennCNV	16	17410970	17419626	8656	Gain
Grauvieh	PennCNV	16	49386191	49506073	119882	Loss
Grauvieh	PennCNV	16	50709889	50864179	154290	Loss
Grauvieh	PennCNV	16	51572475	51661530	89055	Loss
Grauvieh	PennCNV	16	51925319	51959729	34410	Loss
Grauvieh	PennCNV	16	52522676	52532843	10167	Loss
Grauvieh	PennCNV	16	57787080	57858883	71803	Gain
Grauvieh	PennCNV	16	68928517	68936650	8133	Gain
Grauvieh	PennCNV	16	70814352	70938277	123925	Loss
Grauvieh	PennCNV	16	81463631	81550564	86933	Loss
Grauvieh	PennCNV	17	5375	114847	109472	Loss
Grauvieh	PennCNV	17	805459	855311	49852	Loss
Grauvieh	PennCNV	17	924176	1052259	128083	Loss
Grauvieh	PennCNV	17	8821448	8842592	21144	Loss
Grauvieh	PennCNV	17	9952569	9959822	7253	Loss
Grauvieh	PennCNV	17	31818993	31832242	13249	Loss
Grauvieh	PennCNV	17	32184409	32229467	45058	Loss
Grauvieh	PennCNV	17	41478808	41485376	6568	Gain
Grauvieh	PennCNV	17	42395847	42688661	292814	Loss
Grauvieh	PennCNV	17	47599108	47613607	14499	Loss
Grauvieh	PennCNV	17	56932950	56956188	23238	Loss
Grauvieh	PennCNV	17	63655359	63668916	13557	Both
Grauvieh	PennCNV	17	64826336	64843236	16900	Loss
Grauvieh	PennCNV	17	68281923	68495846	213923	Loss
Grauvieh	PennCNV	17	71867249	71926370	59121	Loss
Grauvieh	PennCNV	17	73275111	73329574	54463	Gain
Grauvieh	PennCNV	17	73332372	73400269	67897	Loss
Grauvieh	PennCNV	17	73700474	75132928	1432454	Loss
Grauvieh	PennCNV	18	1443612	1560390	116778	Loss
Grauvieh	PennCNV	18	3092459	3114628	22169	Loss
Grauvieh	PennCNV	18	11500633	11537285	36652	Loss
Grauvieh	PennCNV	18	13343265	13357199	13934	Loss
Grauvieh	PennCNV	18	13370006	13430591	60585	Gain
Grauvieh	PennCNV	18	13669998	13839646	169648	Loss
Grauvieh	PennCNV	18	14222102	14420686	198584	Loss
Grauvieh	PennCNV	18	18816982	18846818	29836	Gain
Grauvieh	PennCNV	18	37703827	37739047	35220	Gain
Grauvieh	PennCNV	18	44020217	44045444	25227	Loss
Grauvieh	PennCNV	18	46382674	46391451	8777	Loss
Grauvieh	PennCNV	18	49292438	49358630	66192	Loss
Grauvieh	PennCNV	18	51251805	51321651	69846	Loss
Grauvieh	PennCNV	18	53349299	53414476	65177	Loss
Grauvieh	PennCNV	18	53944458	53965571	21113	Loss
Grauvieh	PennCNV	18	55180180	55296145	115965	Loss
Grauvieh	PennCNV	18	55572389	55607472	35083	Loss
Grauvieh	PennCNV	18	57024783	57116937	92154	Loss
Grauvieh	PennCNV	18	57342608	57455166	112558	Loss
Grauvieh	PennCNV	18	57879588	57968083	88495	Loss
Grauvieh	PennCNV	18	58629707	58645859	16152	Gain
Grauvieh	PennCNV	18	58985987	59157300	171313	Loss
Grauvieh	PennCNV	18	60502979	60524323	21344	Loss
Grauvieh	PennCNV	18	60821801	60897085	75284	Loss
Grauvieh	PennCNV	18	61906780	61924592	17812	Loss
Grauvieh	PennCNV	18	62396664	62788876	392212	Loss
Grauvieh	PennCNV	18	63080295	63120982	40687	Loss
Grauvieh	PennCNV	18	63163788	63226272	62484	Loss
Grauvieh	PennCNV	18	65402237	65451004	48767	Loss
Grauvieh	PennCNV	18	65569392	65999195	429803	Loss
Grauvieh	PennCNV	19	90671	2702386	2611715	Loss
Grauvieh	PennCNV	19	2857734	2889922	32188	Loss
Grauvieh	PennCNV	19	2922985	3024589	101604	Loss
Grauvieh	PennCNV	19	3066411	3357822	291411	Loss
Grauvieh	PennCNV	19	3896101	3919885	23784	Loss
Grauvieh	PennCNV	19	4137025	4150158	13133	Loss
Grauvieh	PennCNV	19	9890370	9952798	62428	Gain
Grauvieh	PennCNV	19	19131785	19181132	49347	Gain
Grauvieh	PennCNV	19	25181518	25185813	4295	Loss
Grauvieh	PennCNV	19	27467245	27498953	31708	Loss
Grauvieh	PennCNV	19	27611595	27713812	102217	Loss
Grauvieh	PennCNV	19	28126539	28221665	95126	Loss
Grauvieh	PennCNV	19	28987714	29023632	35918	Loss
Grauvieh	PennCNV	19	31955479	32026979	71500	Loss
Grauvieh	PennCNV	19	34093483	34175747	82264	Loss
Grauvieh	PennCNV	19	34319757	34371541	51784	Loss
Grauvieh	PennCNV	19	34773688	35455845	682157	Loss
Grauvieh	PennCNV	19	35554227	35695156	140929	Loss
Grauvieh	PennCNV	19	36306286	36373950	67664	Loss
Grauvieh	PennCNV	19	36712282	36777993	65711	Loss
Grauvieh	PennCNV	19	37041794	37068014	26220	Loss
Grauvieh	PennCNV	19	37222268	37269330	47062	Loss
Grauvieh	PennCNV	19	37343959	37632273	288314	Loss
Grauvieh	PennCNV	19	37691059	37725214	34155	Loss
Grauvieh	PennCNV	19	39064320	39240187	175867	Loss
Grauvieh	PennCNV	19	39545951	39738418	192467	Loss
Grauvieh	PennCNV	19	40076258	40157414	81156	Loss
Grauvieh	PennCNV	19	40254915	40263453	8538	Loss
Grauvieh	PennCNV	19	40541041	40798581	257540	Loss
Grauvieh	PennCNV	19	40976684	41138394	161710	Loss
Grauvieh	PennCNV	19	41338083	41424753	86670	Loss
Grauvieh	PennCNV	19	42288453	42294564	6111	Loss
Grauvieh	PennCNV	19	42435662	42578938	143276	Loss
Grauvieh	PennCNV	19	42834212	43184542	350330	Loss
Grauvieh	PennCNV	19	44469777	44689047	219270	Loss
Grauvieh	PennCNV	19	45233834	45269712	35878	Loss
Grauvieh	PennCNV	19	45522528	45539003	16475	Loss
Grauvieh	PennCNV	19	45654700	45710313	55613	Loss
Grauvieh	PennCNV	19	45995134	46068839	73705	Loss
Grauvieh	PennCNV	19	46129656	46221220	91564	Loss
Grauvieh	PennCNV	19	46354191	46407549	53358	Loss
Grauvieh	PennCNV	19	46987073	47814759	827686	Loss
Grauvieh	PennCNV	19	48294712	48449511	154799	Loss
Grauvieh	PennCNV	19	48506573	48515270	8697	Loss
Grauvieh	PennCNV	19	48789336	48866224	76888	Loss
Grauvieh	PennCNV	19	49168331	49347853	179522	Loss
Grauvieh	PennCNV	19	51181186	51194835	13649	Loss
Grauvieh	PennCNV	19	51319695	51349695	30000	Loss
Grauvieh	PennCNV	19	51417333	51498946	81613	Loss
Grauvieh	PennCNV	19	51603576	51750775	147199	Loss
Grauvieh	PennCNV	19	51911878	52030537	118659	Loss
Grauvieh	PennCNV	19	52159475	52271188	111713	Loss
Grauvieh	PennCNV	19	53191922	53241303	49381	Loss
Grauvieh	PennCNV	19	53811225	53979017	167792	Loss
Grauvieh	PennCNV	19	56180020	56208592	28572	Loss
Grauvieh	PennCNV	19	56481559	56526824	45265	Loss
Grauvieh	PennCNV	19	57055146	57112623	57477	Loss
Grauvieh	PennCNV	19	62852847	62886354	33507	Loss
Grauvieh	PennCNV	19	63230235	63262941	32706	Gain
Grauvieh	PennCNV	19	63344091	63351304	7213	Loss
Grauvieh	PennCNV	19	63433919	63440816	6897	Loss
Grauvieh	PennCNV	19	63815230	64044783	229553	Loss
Grauvieh	PennCNV	20	44050391	44131273	80882	Loss
Grauvieh	PennCNV	20	47116159	47135281	19122	Loss
Grauvieh	PennCNV	20	71004421	71050264	45843	Loss
Grauvieh	PennCNV	20	71214057	71331199	117142	Loss
Grauvieh	PennCNV	20	71682295	71742701	60406	Loss
Grauvieh	PennCNV	21	344274	383680	39406	Loss
Grauvieh	PennCNV	21	552613	620263	67650	Loss
Grauvieh	PennCNV	21	1042286	1264130	221844	Loss
Grauvieh	PennCNV	21	30871146	30899537	28391	Loss
Grauvieh	PennCNV	21	52308530	52326608	18078	Loss
Grauvieh	PennCNV	21	54185150	54220134	34984	Loss
Grauvieh	PennCNV	21	59276655	59291824	15169	Gain
Grauvieh	PennCNV	21	70464408	70470241	5833	Loss
Grauvieh	PennCNV	21	70803573	70894486	90913	Loss
Grauvieh	PennCNV	21	71013019	71077483	64464	Loss
Grauvieh	PennCNV	21	71160861	71193039	32178	Loss
Grauvieh	PennCNV	21	71349616	71384115	34499	Loss
Grauvieh	PennCNV	22	18777748	18832402	54654	Loss
Grauvieh	PennCNV	22	22142383	22157718	15335	Gain
Grauvieh	PennCNV	22	27930107	27947878	17771	Loss
Grauvieh	PennCNV	22	27964524	27988210	23686	Gain
Grauvieh	PennCNV	22	41522624	41531511	8887	Gain
Grauvieh	PennCNV	22	41561978	41589642	27664	Gain
Grauvieh	PennCNV	22	50346158	50415581	69423	Loss
Grauvieh	PennCNV	22	51865370	51889515	24145	Loss
Grauvieh	PennCNV	22	53363386	53376821	13435	Loss
Grauvieh	PennCNV	23	43444	151779	108335	Loss
Grauvieh	PennCNV	23	467839	538028	70189	Loss
Grauvieh	PennCNV	23	755655	768850	13195	Loss
Grauvieh	PennCNV	23	7484879	7547153	62274	Loss
Grauvieh	PennCNV	23	28486281	28494393	8112	Gain
Grauvieh	PennCNV	23	29024901	29079916	55015	Loss
Grauvieh	PennCNV	23	29276651	29320903	44252	Gain
Grauvieh	PennCNV	23	30441844	30443202	1358	Loss
Grauvieh	PennCNV	23	34442052	34484370	42318	Gain
Grauvieh	PennCNV	23	35566555	35584577	18022	Gain
Grauvieh	PennCNV	23	37063074	37071377	8303	Loss
Grauvieh	PennCNV	23	45780856	45803356	22500	Gain
Grauvieh	PennCNV	23	46943944	46954556	10612	Gain
Grauvieh	PennCNV	23	52382136	52458364	76228	Loss
Grauvieh	PennCNV	24	18202411	18222210	19799	Loss
Grauvieh	PennCNV	24	20182828	20226554	43726	Gain
Grauvieh	PennCNV	24	41976143	42021575	45432	Loss
Grauvieh	PennCNV	24	52512200	52528126	15926	Loss
Grauvieh	PennCNV	25	290846	680414	389568	Loss
Grauvieh	PennCNV	25	708438	798884	90446	Loss
Grauvieh	PennCNV	25	853665	1214553	360888	Loss
Grauvieh	PennCNV	25	1365841	1431881	66040	Loss
Grauvieh	PennCNV	25	1471684	1503824	32140	Loss
Grauvieh	PennCNV	25	1570473	1665327	94854	Loss
Grauvieh	PennCNV	25	1742571	1778229	35658	Loss
Grauvieh	PennCNV	25	1915926	2011350	95424	Loss
Grauvieh	PennCNV	25	2091391	2263020	171629	Loss
Grauvieh	PennCNV	25	2406235	2412235	6000	Loss
Grauvieh	PennCNV	25	3497319	3738438	241119	Loss
Grauvieh	PennCNV	25	9359696	9363138	3442	Gain
Grauvieh	PennCNV	25	9615561	9664651	49090	Gain
Grauvieh	PennCNV	25	10004035	10086786	82751	Loss
Grauvieh	PennCNV	25	10170208	10203107	32899	Loss
Grauvieh	PennCNV	25	19247922	19336031	88109	Loss
Grauvieh	PennCNV	25	25978348	26025507	47159	Loss
Grauvieh	PennCNV	25	26122851	26159981	37130	Loss
Grauvieh	PennCNV	25	26175012	26294947	119935	Loss
Grauvieh	PennCNV	25	26488786	26544290	55504	Loss
Grauvieh	PennCNV	25	30961643	31101563	139920	Loss
Grauvieh	PennCNV	25	33573698	33633424	59726	Loss
Grauvieh	PennCNV	25	36427619	36448529	20910	Loss
Grauvieh	PennCNV	25	36672988	36699432	26444	Loss
Grauvieh	PennCNV	25	36728453	36767552	39099	Loss
Grauvieh	PennCNV	25	37209147	37294663	85516	Gain
Grauvieh	PennCNV	25	39411837	39632118	220281	Loss
Grauvieh	PennCNV	25	39735661	39753576	17915	Loss
Grauvieh	PennCNV	25	41250992	41348788	97796	Loss
Grauvieh	PennCNV	25	41523769	41673386	149617	Loss
Grauvieh	PennCNV	25	41935313	42037102	101789	Loss
Grauvieh	PennCNV	25	42209739	42343345	133606	Loss
Grauvieh	PennCNV	25	42640462	42777451	136989	Loss
Grauvieh	PennCNV	26	466869	586994	120125	Loss
Grauvieh	PennCNV	26	2064524	2119205	54681	Loss
Grauvieh	PennCNV	26	24667660	24681812	14152	Loss
Grauvieh	PennCNV	26	25252399	25259279	6880	Gain
Grauvieh	PennCNV	26	25784825	25808578	23753	Loss
Grauvieh	PennCNV	26	25876777	26013587	136810	Loss
Grauvieh	PennCNV	26	28713575	28802987	89412	Loss
Grauvieh	PennCNV	26	36276090	36283356	7266	Gain
Grauvieh	PennCNV	27	37080685	37104549	23864	Loss
Grauvieh	PennCNV	28	2385190	2853011	467821	Loss
Grauvieh	PennCNV	28	26558460	26567131	8671	Loss
Grauvieh	PennCNV	28	28987294	29050764	63470	Gain
Grauvieh	PennCNV	28	43812394	43838008	25614	Loss
Grauvieh	PennCNV	28	45646897	45703110	56213	Loss
Grauvieh	PennCNV	29	19332326	19352009	19683	Loss
Grauvieh	PennCNV	29	19452488	19479962	27474	Loss
Grauvieh	PennCNV	29	19855031	19862218	7187	Loss
Grauvieh	PennCNV	29	27184360	27203224	18864	Gain
Grauvieh	PennCNV	29	27363231	27434827	71596	Loss
Grauvieh	PennCNV	29	39413453	39846954	433501	Loss
Grauvieh	PennCNV	29	43652252	43816859	164607	Loss
Grauvieh	PennCNV	29	44931337	44990687	59350	Loss
Grauvieh	PennCNV	29	46115170	46239951	124781	Loss
Grauvieh	PennCNV	29	47079035	47113040	34005	Loss
Grauvieh	PennCNV	29	47621238	47690650	69412	Loss
Grauvieh	PennCNV	29	49445342	49482772	37430	Loss
Grauvieh	PennCNV	29	49922377	49955008	32631	Loss
Grauvieh	PennCNV	29	50059018	50146014	86996	Loss
Grauvieh	PennCNV	29	50246685	50307491	60806	Loss
Grauvieh	PennCNV	29	50533499	50580490	46991	Loss
Grauvieh	PennCNV	29	50824530	50899595	75065	Loss
Grauvieh	PennCNV	29	50997949	51087878	89929	Loss
Grauvieh	PennCNV	29	51116489	51211670	95181	Loss
Grauvieh	PennCNV	29	51396010	51502868	106858	Loss
Pinzgauer	PennCNV	1	6308399	6326544	18145	Both
Pinzgauer	PennCNV	1	9991252	9997599	6347	Loss
Pinzgauer	PennCNV	1	22240266	22270151	29885	Loss
Pinzgauer	PennCNV	1	29564404	29573089	8685	Loss
Pinzgauer	PennCNV	1	36657491	36672662	15171	Loss
Pinzgauer	PennCNV	1	44242697	44255087	12390	Loss
Pinzgauer	PennCNV	1	44914154	45126351	212197	Loss
Pinzgauer	PennCNV	1	46168707	46239127	70420	Loss
Pinzgauer	PennCNV	1	46582698	46595049	12351	Loss
Pinzgauer	PennCNV	1	49643043	49666332	23289	Loss
Pinzgauer	PennCNV	1	56975189	56980346	5157	Gain
Pinzgauer	PennCNV	1	65307312	65333099	25787	Loss
Pinzgauer	PennCNV	1	66456475	66480240	23765	Loss
Pinzgauer	PennCNV	1	69478627	69511543	32916	Loss
Pinzgauer	PennCNV	1	70761742	70781667	19925	Both
Pinzgauer	PennCNV	1	72162062	72241591	79529	Loss
Pinzgauer	PennCNV	1	75987278	76045397	58119	Loss
Pinzgauer	PennCNV	1	83172475	83238102	65627	Loss
Pinzgauer	PennCNV	1	90719701	90727799	8098	Loss
Pinzgauer	PennCNV	1	91476235	91484431	8196	Loss
Pinzgauer	PennCNV	1	93329315	93429781	100466	Gain
Pinzgauer	PennCNV	1	95479694	95514442	34748	Loss
Pinzgauer	PennCNV	1	101175816	101207382	31566	Loss
Pinzgauer	PennCNV	1	103167073	103168693	1620	Loss
Pinzgauer	PennCNV	1	114747747	114767629	19882	Loss
Pinzgauer	PennCNV	1	124392389	124420643	28254	Loss
Pinzgauer	PennCNV	1	132313878	132338002	24124	Loss
Pinzgauer	PennCNV	1	133973868	134010528	36660	Loss
Pinzgauer	PennCNV	1	136476195	136483002	6807	Gain
Pinzgauer	PennCNV	1	138754111	138784009	29898	Loss
Pinzgauer	PennCNV	2	6889	185262	178373	Loss
Pinzgauer	PennCNV	2	306588	401505	94917	Loss
Pinzgauer	PennCNV	2	6974670	6981386	6716	Gain
Pinzgauer	PennCNV	2	8487559	8493420	5861	Loss
Pinzgauer	PennCNV	2	42583065	42593591	10526	Loss
Pinzgauer	PennCNV	2	45584050	45592982	8932	Loss
Pinzgauer	PennCNV	2	46477034	46485436	8402	Loss
Pinzgauer	PennCNV	2	54460451	54482390	21939	Loss
Pinzgauer	PennCNV	2	64003580	64014001	10421	Gain
Pinzgauer	PennCNV	2	73676224	73703725	27501	Loss
Pinzgauer	PennCNV	2	75913220	75933405	20185	Loss
Pinzgauer	PennCNV	2	76262384	76300213	37829	Loss
Pinzgauer	PennCNV	2	78541457	78545093	3636	Gain
Pinzgauer	PennCNV	2	79905216	79916832	11616	Loss
Pinzgauer	PennCNV	2	82987606	83054006	66400	Loss
Pinzgauer	PennCNV	2	98480344	98490521	10177	Gain
Pinzgauer	PennCNV	2	104824189	105011773	187584	Loss
Pinzgauer	PennCNV	2	109940433	109957438	17005	Loss
Pinzgauer	PennCNV	2	124330343	124394326	63983	Loss
Pinzgauer	PennCNV	2	130200917	130204643	3726	Loss
Pinzgauer	PennCNV	2	133220453	133232598	12145	Loss
Pinzgauer	PennCNV	2	135580681	135600853	20172	Loss
Pinzgauer	PennCNV	2	135878554	135979639	101085	Gain
Pinzgauer	PennCNV	2	135990621	135992605	1984	Loss
Pinzgauer	PennCNV	2	136476680	136525277	48597	Loss
Pinzgauer	PennCNV	3	706336	760520	54184	Gain
Pinzgauer	PennCNV	3	1789043	1804117	15074	Loss
Pinzgauer	PennCNV	3	20964087	20985179	21092	Gain
Pinzgauer	PennCNV	3	45572779	45592023	19244	Loss
Pinzgauer	PennCNV	3	50167465	50191213	23748	Loss
Pinzgauer	PennCNV	3	54251564	54253993	2429	Gain
Pinzgauer	PennCNV	3	54369910	54414408	44498	Gain
Pinzgauer	PennCNV	3	54541000	54820361	279361	Gain
Pinzgauer	PennCNV	3	96163610	96185412	21802	Loss
Pinzgauer	PennCNV	3	97045586	97049900	4314	Loss
Pinzgauer	PennCNV	3	99760127	99787244	27117	Loss
Pinzgauer	PennCNV	3	99811044	99836774	25730	Gain
Pinzgauer	PennCNV	3	105705145	105739637	34492	Loss
Pinzgauer	PennCNV	3	115345791	115352496	6705	Loss
Pinzgauer	PennCNV	3	119752388	119769830	17442	Loss
Pinzgauer	PennCNV	3	119899662	119913595	13933	Gain
Pinzgauer	PennCNV	3	120319184	120740360	421176	Loss
Pinzgauer	PennCNV	3	121102730	121150141	47411	Loss
Pinzgauer	PennCNV	4	1062	217670	216608	Loss
Pinzgauer	PennCNV	4	751020	783481	32461	Gain
Pinzgauer	PennCNV	4	14410866	14417887	7021	Loss
Pinzgauer	PennCNV	4	18685026	18688622	3596	Loss
Pinzgauer	PennCNV	4	23760228	23774504	14276	Gain
Pinzgauer	PennCNV	4	43476445	43487686	11241	Loss
Pinzgauer	PennCNV	4	45054839	45072215	17376	Loss
Pinzgauer	PennCNV	4	46154398	46156359	1961	Loss
Pinzgauer	PennCNV	4	47322185	47367626	45441	Loss
Pinzgauer	PennCNV	4	59156453	59242378	85925	Loss
Pinzgauer	PennCNV	4	59801840	59953839	151999	Gain
Pinzgauer	PennCNV	4	73369761	73383448	13687	Loss
Pinzgauer	PennCNV	4	73988881	74013443	24562	Loss
Pinzgauer	PennCNV	4	75012204	75096201	83997	Loss
Pinzgauer	PennCNV	4	78209480	78230237	20757	Gain
Pinzgauer	PennCNV	4	83429553	83463128	33575	Gain
Pinzgauer	PennCNV	4	85611995	85923262	311267	Both
Pinzgauer	PennCNV	4	91095329	91100035	4706	Loss
Pinzgauer	PennCNV	4	92050389	92056593	6204	Gain
Pinzgauer	PennCNV	4	105973753	105986515	12762	Loss
Pinzgauer	PennCNV	4	106031736	106142458	110722	Gain
Pinzgauer	PennCNV	4	107219556	107253901	34345	Gain
Pinzgauer	PennCNV	4	108141346	108171759	30413	Gain
Pinzgauer	PennCNV	4	108272921	108298969	26048	Gain
Pinzgauer	PennCNV	4	109085439	109098126	12687	Gain
Pinzgauer	PennCNV	4	113657341	113664827	7486	Gain
Pinzgauer	PennCNV	4	113696929	113745581	48652	Gain
Pinzgauer	PennCNV	4	118495624	118499730	4106	Gain
Pinzgauer	PennCNV	5	171070	554291	383221	Both
Pinzgauer	PennCNV	5	4262602	4667303	404701	Both
Pinzgauer	PennCNV	5	4674939	4686943	12004	Gain
Pinzgauer	PennCNV	5	22514133	22563988	49855	Loss
Pinzgauer	PennCNV	5	26010479	26052926	42447	Loss
Pinzgauer	PennCNV	5	31896234	31927058	30824	Loss
Pinzgauer	PennCNV	5	36297024	36299121	2097	Loss
Pinzgauer	PennCNV	5	46514093	46520722	6629	Loss
Pinzgauer	PennCNV	5	73185738	73192517	6779	Loss
Pinzgauer	PennCNV	5	79941263	79950141	8878	Loss
Pinzgauer	PennCNV	5	90813987	90837905	23918	Loss
Pinzgauer	PennCNV	5	95056492	95069080	12588	Loss
Pinzgauer	PennCNV	5	102458909	102538245	79336	Loss
Pinzgauer	PennCNV	5	103280697	103454169	173472	Both
Pinzgauer	PennCNV	5	110707594	110727927	20333	Loss
Pinzgauer	PennCNV	5	112384051	112422851	38800	Loss
Pinzgauer	PennCNV	5	115039452	115061022	21570	Gain
Pinzgauer	PennCNV	5	116996681	117007635	10954	Loss
Pinzgauer	PennCNV	5	117281795	117631559	349764	Both
Pinzgauer	PennCNV	5	119847945	119989587	141642	Loss
Pinzgauer	PennCNV	6	33839	168081	134242	Loss
Pinzgauer	PennCNV	6	283007	419328	136321	Loss
Pinzgauer	PennCNV	6	449903	456602	6699	Loss
Pinzgauer	PennCNV	6	462518	531889	69371	Gain
Pinzgauer	PennCNV	6	635666	908374	272708	Loss
Pinzgauer	PennCNV	6	1060599	1069734	9135	Loss
Pinzgauer	PennCNV	6	1074664	1100413	25749	Loss
Pinzgauer	PennCNV	6	1150488	1153652	3164	Gain
Pinzgauer	PennCNV	6	1157029	1237410	80381	Loss
Pinzgauer	PennCNV	6	1298793	1414504	115711	Loss
Pinzgauer	PennCNV	6	1712714	1900697	187983	Loss
Pinzgauer	PennCNV	6	2015385	2108836	93451	Loss
Pinzgauer	PennCNV	6	3076943	3146682	69739	Loss
Pinzgauer	PennCNV	6	4004618	4084466	79848	Loss
Pinzgauer	PennCNV	6	5062235	5298300	236065	Loss
Pinzgauer	PennCNV	6	6762286	6774845	12559	Loss
Pinzgauer	PennCNV	6	7852787	7870230	17443	Loss
Pinzgauer	PennCNV	6	8691967	8716319	24352	Loss
Pinzgauer	PennCNV	6	11088235	11165698	77463	Loss
Pinzgauer	PennCNV	6	12846571	12856335	9764	Loss
Pinzgauer	PennCNV	6	13874247	13881434	7187	Loss
Pinzgauer	PennCNV	6	28989049	28994000	4951	Loss
Pinzgauer	PennCNV	6	39131253	39177795	46542	Loss
Pinzgauer	PennCNV	6	39391155	39456708	65553	Loss
Pinzgauer	PennCNV	6	53468944	53794478	325534	Loss
Pinzgauer	PennCNV	6	55024101	55042305	18204	Loss
Pinzgauer	PennCNV	6	79144387	79160617	16230	Loss
Pinzgauer	PennCNV	6	80650200	80665501	15301	Loss
Pinzgauer	PennCNV	6	80741948	80755942	13994	Loss
Pinzgauer	PennCNV	6	81268693	81279597	10904	Loss
Pinzgauer	PennCNV	6	86122072	86154933	32861	Both
Pinzgauer	PennCNV	6	102240946	102248635	7689	Gain
Pinzgauer	PennCNV	6	106899736	106922320	22584	Loss
Pinzgauer	PennCNV	6	108756437	108770010	13573	Loss
Pinzgauer	PennCNV	6	108836475	108875368	38893	Loss
Pinzgauer	PennCNV	6	108971589	108998175	26586	Loss
Pinzgauer	PennCNV	6	109419395	109445567	26172	Loss
Pinzgauer	PennCNV	6	109661494	109693443	31949	Loss
Pinzgauer	PennCNV	6	117092109	117097825	5716	Loss
Pinzgauer	PennCNV	7	10880	286246	275366	Both
Pinzgauer	PennCNV	7	353409	397437	44028	Loss
Pinzgauer	PennCNV	7	434978	490026	55048	Loss
Pinzgauer	PennCNV	7	934230	1002240	68010	Loss
Pinzgauer	PennCNV	7	1138698	1182701	44003	Loss
Pinzgauer	PennCNV	7	1804836	1815857	11021	Loss
Pinzgauer	PennCNV	7	1999256	2122626	123370	Loss
Pinzgauer	PennCNV	7	2594859	2646809	51950	Loss
Pinzgauer	PennCNV	7	3092224	3208817	116593	Loss
Pinzgauer	PennCNV	7	3737495	3810680	73185	Loss
Pinzgauer	PennCNV	7	4480874	4524536	43662	Loss
Pinzgauer	PennCNV	7	4626145	4676302	50157	Loss
Pinzgauer	PennCNV	7	6698584	6718398	19814	Both
Pinzgauer	PennCNV	7	8064458	8133249	68791	Loss
Pinzgauer	PennCNV	7	9229213	9558112	328899	Loss
Pinzgauer	PennCNV	7	9659836	11332696	1672860	Both
Pinzgauer	PennCNV	7	13133212	13148001	14789	Loss
Pinzgauer	PennCNV	7	14714172	14719678	5506	Loss
Pinzgauer	PennCNV	7	15071928	15190305	118377	Loss
Pinzgauer	PennCNV	7	15361832	15382521	20689	Loss
Pinzgauer	PennCNV	7	17077592	17106691	29099	Loss
Pinzgauer	PennCNV	7	18518171	18566035	47864	Both
Pinzgauer	PennCNV	7	23813839	23855608	41769	Loss
Pinzgauer	PennCNV	7	35011797	35198498	186701	Loss
Pinzgauer	PennCNV	7	39276812	39286694	9882	Loss
Pinzgauer	PennCNV	7	41582892	41588354	5462	Loss
Pinzgauer	PennCNV	7	42745346	42788788	43442	Loss
Pinzgauer	PennCNV	7	43081934	43173707	91773	Gain
Pinzgauer	PennCNV	7	45265853	45385073	119220	Loss
Pinzgauer	PennCNV	7	52596769	52602998	6229	Loss
Pinzgauer	PennCNV	7	69916568	69931500	14932	Loss
Pinzgauer	PennCNV	7	70005850	70024164	18314	Loss
Pinzgauer	PennCNV	7	70191120	70267774	76654	Loss
Pinzgauer	PennCNV	7	79550184	79554205	4021	Loss
Pinzgauer	PennCNV	7	79859083	79866641	7558	Gain
Pinzgauer	PennCNV	7	83460948	83462334	1386	Loss
Pinzgauer	PennCNV	7	87108583	87133023	24440	Loss
Pinzgauer	PennCNV	7	87452028	87457363	5335	Loss
Pinzgauer	PennCNV	7	87868480	87955307	86827	Loss
Pinzgauer	PennCNV	7	99113453	99116654	3201	Loss
Pinzgauer	PennCNV	7	100041017	100047382	6365	Gain
Pinzgauer	PennCNV	7	106547342	106557071	9729	Loss
Pinzgauer	PennCNV	7	112013397	112024873	11476	Gain
Pinzgauer	PennCNV	8	20855	35222	14367	Gain
Pinzgauer	PennCNV	8	95630	113242	17612	Loss
Pinzgauer	PennCNV	8	12440991	12504399	63408	Both
Pinzgauer	PennCNV	8	15374573	15387156	12583	Loss
Pinzgauer	PennCNV	8	22973761	23036161	62400	Both
Pinzgauer	PennCNV	8	34626261	34667933	41672	Loss
Pinzgauer	PennCNV	8	51596453	51608386	11933	Loss
Pinzgauer	PennCNV	8	77675650	77685109	9459	Loss
Pinzgauer	PennCNV	8	93776052	93792855	16803	Gain
Pinzgauer	PennCNV	8	94556246	94622430	66184	Gain
Pinzgauer	PennCNV	8	96143986	96181815	37829	Loss
Pinzgauer	PennCNV	8	105168710	105206962	38252	Gain
Pinzgauer	PennCNV	9	28755	915228	886473	Loss
Pinzgauer	PennCNV	9	1480680	1721741	241061	Loss
Pinzgauer	PennCNV	9	2295887	2319567	23680	Loss
Pinzgauer	PennCNV	9	2525040	2534069	9029	Loss
Pinzgauer	PennCNV	9	3224764	3303405	78641	Loss
Pinzgauer	PennCNV	9	3619685	3659242	39557	Loss
Pinzgauer	PennCNV	9	4161590	4188687	27097	Loss
Pinzgauer	PennCNV	9	5610931	5619077	8146	Loss
Pinzgauer	PennCNV	9	6581699	6597289	15590	Loss
Pinzgauer	PennCNV	9	13985299	13992239	6940	Loss
Pinzgauer	PennCNV	9	28650096	28867098	217002	Loss
Pinzgauer	PennCNV	9	29045060	29054899	9839	Loss
Pinzgauer	PennCNV	9	30932163	30976750	44587	Loss
Pinzgauer	PennCNV	9	38353477	38374639	21162	Loss
Pinzgauer	PennCNV	9	40773918	40851516	77598	Gain
Pinzgauer	PennCNV	9	43960964	43965192	4228	Loss
Pinzgauer	PennCNV	9	53893533	53899150	5617	Loss
Pinzgauer	PennCNV	9	55431837	55445123	13286	Loss
Pinzgauer	PennCNV	9	56958864	56986268	27404	Gain
Pinzgauer	PennCNV	9	57961111	57970391	9280	Gain
Pinzgauer	PennCNV	9	64499217	64513583	14366	Loss
Pinzgauer	PennCNV	9	69829158	69837058	7900	Loss
Pinzgauer	PennCNV	9	86610045	86623838	13793	Loss
Pinzgauer	PennCNV	9	91300647	91315265	14618	Gain
Pinzgauer	PennCNV	9	95962909	96002179	39270	Gain
Pinzgauer	PennCNV	9	100282999	100309628	26629	Loss
Pinzgauer	PennCNV	9	101685154	101687104	1950	Gain
Pinzgauer	PennCNV	10	23914	166840	142926	Loss
Pinzgauer	PennCNV	10	369644	414065	44421	Loss
Pinzgauer	PennCNV	10	1513505	1578664	65159	Loss
Pinzgauer	PennCNV	10	6268796	6288477	19681	Loss
Pinzgauer	PennCNV	10	16662635	16665097	2462	Loss
Pinzgauer	PennCNV	10	22647333	23155925	508592	Both
Pinzgauer	PennCNV	10	23180741	25231436	2050695	Both
Pinzgauer	PennCNV	10	39509063	39514729	5666	Loss
Pinzgauer	PennCNV	10	41584872	41595553	10681	Loss
Pinzgauer	PennCNV	10	60195930	60201542	5612	Both
Pinzgauer	PennCNV	10	77610454	77632904	22450	Loss
Pinzgauer	PennCNV	10	78880133	78900497	20364	Gain
Pinzgauer	PennCNV	10	87275459	87293936	18477	Gain
Pinzgauer	PennCNV	10	87354861	87459426	104565	Loss
Pinzgauer	PennCNV	10	94231172	94298663	67491	Loss
Pinzgauer	PennCNV	11	21356311	21377190	20879	Gain
Pinzgauer	PennCNV	11	39880479	39917946	37467	Gain
Pinzgauer	PennCNV	11	53237587	53239796	2209	Loss
Pinzgauer	PennCNV	11	59035223	59045008	9785	Loss
Pinzgauer	PennCNV	11	86004932	86040428	35496	Loss
Pinzgauer	PennCNV	11	93446805	93459834	13029	Gain
Pinzgauer	PennCNV	11	93545372	93571781	26409	Gain
Pinzgauer	PennCNV	11	96538529	96756491	217962	Loss
Pinzgauer	PennCNV	11	103685133	103793595	108462	Loss
Pinzgauer	PennCNV	11	103821456	103836737	15281	Loss
Pinzgauer	PennCNV	11	103858289	103904481	46192	Loss
Pinzgauer	PennCNV	11	103994125	104057720	63595	Loss
Pinzgauer	PennCNV	11	105221941	105289442	67501	Loss
Pinzgauer	PennCNV	11	105699664	105841005	141341	Loss
Pinzgauer	PennCNV	11	106196578	106312079	115501	Both
Pinzgauer	PennCNV	11	106373926	106415916	41990	Loss
Pinzgauer	PennCNV	11	106645995	106674546	28551	Loss
Pinzgauer	PennCNV	11	107143814	107186828	43014	Loss
Pinzgauer	PennCNV	12	6351	111930	105579	Loss
Pinzgauer	PennCNV	12	851956	854270	2314	Loss
Pinzgauer	PennCNV	12	936045	944850	8805	Loss
Pinzgauer	PennCNV	12	4523191	4546010	22819	Loss
Pinzgauer	PennCNV	12	19081593	19099906	18313	Loss
Pinzgauer	PennCNV	12	30177093	30211551	34458	Loss
Pinzgauer	PennCNV	12	30389680	30411566	21886	Loss
Pinzgauer	PennCNV	12	32054331	32182960	128629	Loss
Pinzgauer	PennCNV	12	37252068	37307065	54997	Loss
Pinzgauer	PennCNV	12	37358859	37408007	49148	Loss
Pinzgauer	PennCNV	12	38695128	38714190	19062	Loss
Pinzgauer	PennCNV	12	41821603	41831612	10009	Loss
Pinzgauer	PennCNV	12	42760473	42784397	23924	Loss
Pinzgauer	PennCNV	12	43164746	43196111	31365	Loss
Pinzgauer	PennCNV	12	44377532	44381354	3822	Loss
Pinzgauer	PennCNV	12	44485044	44526211	41167	Loss
Pinzgauer	PennCNV	12	45046667	45080528	33861	Loss
Pinzgauer	PennCNV	12	48972496	48975442	2946	Loss
Pinzgauer	PennCNV	12	50418019	50429474	11455	Loss
Pinzgauer	PennCNV	12	54965556	55014644	49088	Loss
Pinzgauer	PennCNV	12	57705015	57720361	15346	Loss
Pinzgauer	PennCNV	12	60633381	60664504	31123	Loss
Pinzgauer	PennCNV	12	61368647	61395297	26650	Loss
Pinzgauer	PennCNV	12	61850615	61861424	10809	Gain
Pinzgauer	PennCNV	12	65393400	65415610	22210	Loss
Pinzgauer	PennCNV	12	66855326	66866085	10759	Loss
Pinzgauer	PennCNV	12	70392108	72123747	1731639	Both
Pinzgauer	PennCNV	12	72168225	72264806	96581	Loss
Pinzgauer	PennCNV	12	72271847	72329951	58104	Loss
Pinzgauer	PennCNV	12	72369351	72388328	18977	Loss
Pinzgauer	PennCNV	12	72432362	73666963	1234601	Both
Pinzgauer	PennCNV	12	74369197	74894950	525753	Loss
Pinzgauer	PennCNV	12	75238779	75293758	54979	Gain
Pinzgauer	PennCNV	12	75398067	76074162	676095	Both
Pinzgauer	PennCNV	12	90784598	90811012	26414	Loss
Pinzgauer	PennCNV	13	14509110	14543745	34635	Gain
Pinzgauer	PennCNV	13	20394014	20566621	172607	Gain
Pinzgauer	PennCNV	13	21007850	21075493	67643	Gain
Pinzgauer	PennCNV	13	26344707	26356929	12222	Loss
Pinzgauer	PennCNV	13	42425880	42438626	12746	Loss
Pinzgauer	PennCNV	13	43891359	43914560	23201	Gain
Pinzgauer	PennCNV	13	53858853	53862891	4038	Both
Pinzgauer	PennCNV	13	53934586	53985223	50637	Loss
Pinzgauer	PennCNV	13	61562252	61569231	6979	Gain
Pinzgauer	PennCNV	13	72599737	72604755	5018	Loss
Pinzgauer	PennCNV	14	1988704	2089613	100909	Loss
Pinzgauer	PennCNV	14	4802585	4813582	10997	Gain
Pinzgauer	PennCNV	14	6046988	6059066	12078	Gain
Pinzgauer	PennCNV	14	49639609	49661364	21755	Loss
Pinzgauer	PennCNV	14	54805630	54836816	31186	Loss
Pinzgauer	PennCNV	15	43737	124293	80556	Loss
Pinzgauer	PennCNV	15	315079	534856	219777	Loss
Pinzgauer	PennCNV	15	589485	649145	59660	Loss
Pinzgauer	PennCNV	15	673649	875718	202069	Loss
Pinzgauer	PennCNV	15	896462	1363910	467448	Loss
Pinzgauer	PennCNV	15	2743941	2754523	10582	Loss
Pinzgauer	PennCNV	15	6637559	6648462	10903	Loss
Pinzgauer	PennCNV	15	11534530	11541499	6969	Loss
Pinzgauer	PennCNV	15	13602748	13658637	55889	Both
Pinzgauer	PennCNV	15	20057061	20060323	3262	Loss
Pinzgauer	PennCNV	15	45475858	45542956	67098	Loss
Pinzgauer	PennCNV	15	46675064	46691653	16589	Gain
Pinzgauer	PennCNV	15	47811444	47946424	134980	Both
Pinzgauer	PennCNV	15	48814426	48822979	8553	Loss
Pinzgauer	PennCNV	15	49257178	49289999	32821	Gain
Pinzgauer	PennCNV	15	51681720	51714539	32819	Loss
Pinzgauer	PennCNV	15	52130826	52153934	23108	Loss
Pinzgauer	PennCNV	15	77893073	78008169	115096	Loss
Pinzgauer	PennCNV	15	79111229	79126809	15580	Loss
Pinzgauer	PennCNV	15	79218616	79239279	20663	Loss
Pinzgauer	PennCNV	15	79499062	79525723	26661	Loss
Pinzgauer	PennCNV	15	79843368	79878516	35148	Gain
Pinzgauer	PennCNV	15	80280182	80299924	19742	Gain
Pinzgauer	PennCNV	15	80387384	80831076	443692	Both
Pinzgauer	PennCNV	15	81033596	81090121	56525	Loss
Pinzgauer	PennCNV	15	81301329	81310997	9668	Loss
Pinzgauer	PennCNV	15	82657598	82666647	9049	Gain
Pinzgauer	PennCNV	15	84038466	84046192	7726	Loss
Pinzgauer	PennCNV	16	35920	148170	112250	Loss
Pinzgauer	PennCNV	16	5574114	5796090	221976	Both
Pinzgauer	PennCNV	16	5846840	6125517	278677	Gain
Pinzgauer	PennCNV	16	8605747	8623933	18186	Loss
Pinzgauer	PennCNV	16	10867669	10868969	1300	Loss
Pinzgauer	PennCNV	16	12393536	12454337	60801	Loss
Pinzgauer	PennCNV	16	15066677	15243100	176423	Loss
Pinzgauer	PennCNV	16	17412930	17419626	6696	Gain
Pinzgauer	PennCNV	16	50862929	50877651	14722	Loss
Pinzgauer	PennCNV	16	52068803	52103269	34466	Loss
Pinzgauer	PennCNV	16	52509659	52537603	27944	Loss
Pinzgauer	PennCNV	16	55934561	55953402	18841	Loss
Pinzgauer	PennCNV	16	57277225	57344798	67573	Loss
Pinzgauer	PennCNV	16	68891760	68934735	42975	Gain
Pinzgauer	PennCNV	16	70814352	70908905	94553	Loss
Pinzgauer	PennCNV	16	71105580	71141011	35431	Loss
Pinzgauer	PennCNV	16	75952586	75964508	11922	Gain
Pinzgauer	PennCNV	16	81463631	81572554	108923	Loss
Pinzgauer	PennCNV	17	2892	56011	53119	Loss
Pinzgauer	PennCNV	17	1052259	1086624	34365	Loss
Pinzgauer	PennCNV	17	8815216	8945521	130305	Loss
Pinzgauer	PennCNV	17	15448739	15477125	28386	Loss
Pinzgauer	PennCNV	17	28405317	28411102	5785	Loss
Pinzgauer	PennCNV	17	30470352	30474567	4215	Gain
Pinzgauer	PennCNV	17	31818993	31832242	13249	Loss
Pinzgauer	PennCNV	17	35517908	35529247	11339	Loss
Pinzgauer	PennCNV	17	36056925	36074209	17284	Loss
Pinzgauer	PennCNV	17	63656132	63671838	15706	Both
Pinzgauer	PennCNV	17	71533695	71560908	27213	Loss
Pinzgauer	PennCNV	17	71877079	71884117	7038	Loss
Pinzgauer	PennCNV	17	72936768	72961394	24626	Loss
Pinzgauer	PennCNV	17	73215302	73260343	45041	Loss
Pinzgauer	PennCNV	17	73804497	73823924	19427	Loss
Pinzgauer	PennCNV	17	73944911	73949711	4800	Loss
Pinzgauer	PennCNV	17	74344162	74393620	49458	Loss
Pinzgauer	PennCNV	17	74723634	75132928	409294	Loss
Pinzgauer	PennCNV	18	6761228	6769200	7972	Loss
Pinzgauer	PennCNV	18	9741999	9746255	4256	Loss
Pinzgauer	PennCNV	18	13365474	13436491	71017	Gain
Pinzgauer	PennCNV	18	18822010	18846818	24808	Gain
Pinzgauer	PennCNV	18	31628195	31665485	37290	Gain
Pinzgauer	PennCNV	18	40486469	40489086	2617	Loss
Pinzgauer	PennCNV	18	54732486	54754006	21520	Loss
Pinzgauer	PennCNV	18	55663082	55667738	4656	Loss
Pinzgauer	PennCNV	18	56242491	56273509	31018	Loss
Pinzgauer	PennCNV	18	56678917	56743875	64958	Loss
Pinzgauer	PennCNV	18	56942239	57106006	163767	Loss
Pinzgauer	PennCNV	18	58892756	59157300	264544	Loss
Pinzgauer	PennCNV	18	60478436	60886206	407770	Loss
Pinzgauer	PennCNV	18	61241191	61255977	14786	Loss
Pinzgauer	PennCNV	18	61768443	61924592	156149	Both
Pinzgauer	PennCNV	18	62164992	62871248	706256	Loss
Pinzgauer	PennCNV	18	63070148	63172836	102688	Loss
Pinzgauer	PennCNV	18	64046302	64070793	24491	Loss
Pinzgauer	PennCNV	18	65637325	65975294	337969	Loss
Pinzgauer	PennCNV	19	81083	685006	603923	Loss
Pinzgauer	PennCNV	19	981535	2526899	1545364	Both
Pinzgauer	PennCNV	19	2627143	2645463	18320	Loss
Pinzgauer	PennCNV	19	2698613	2761723	63110	Loss
Pinzgauer	PennCNV	19	2882642	2889922	7280	Gain
Pinzgauer	PennCNV	19	2931363	2971350	39987	Loss
Pinzgauer	PennCNV	19	3044252	3365280	321028	Both
Pinzgauer	PennCNV	19	3645333	3672191	26858	Loss
Pinzgauer	PennCNV	19	6309127	6324535	15408	Loss
Pinzgauer	PennCNV	19	8731971	8755982	24011	Loss
Pinzgauer	PennCNV	19	11516852	11550562	33710	Loss
Pinzgauer	PennCNV	19	16888395	16899776	11381	Gain
Pinzgauer	PennCNV	19	17148553	17152688	4135	Gain
Pinzgauer	PennCNV	19	24541541	24588068	46527	Gain
Pinzgauer	PennCNV	19	27488008	27501912	13904	Loss
Pinzgauer	PennCNV	19	27654958	27706098	51140	Loss
Pinzgauer	PennCNV	19	28366979	28432784	65805	Loss
Pinzgauer	PennCNV	19	34447548	34527501	79953	Loss
Pinzgauer	PennCNV	19	34797396	34818341	20945	Loss
Pinzgauer	PennCNV	19	35570897	35648763	77866	Loss
Pinzgauer	PennCNV	19	37225176	37380736	155560	Loss
Pinzgauer	PennCNV	19	39787585	40301259	513674	Loss
Pinzgauer	PennCNV	19	40660284	40778672	118388	Loss
Pinzgauer	PennCNV	19	40905323	40920241	14918	Loss
Pinzgauer	PennCNV	19	42593638	42613950	20312	Loss
Pinzgauer	PennCNV	19	42914005	42984149	70144	Loss
Pinzgauer	PennCNV	19	44568907	44611691	42784	Loss
Pinzgauer	PennCNV	19	45122089	45275377	153288	Loss
Pinzgauer	PennCNV	19	45456828	45509593	52765	Loss
Pinzgauer	PennCNV	19	45714770	45783902	69132	Loss
Pinzgauer	PennCNV	19	46140602	46257451	116849	Loss
Pinzgauer	PennCNV	19	46881425	47457345	575920	Loss
Pinzgauer	PennCNV	19	47610871	47748362	137491	Loss
Pinzgauer	PennCNV	19	47850893	48068623	217730	Both
Pinzgauer	PennCNV	19	48172365	48192161	19796	Loss
Pinzgauer	PennCNV	19	48449511	48906422	456911	Loss
Pinzgauer	PennCNV	19	50723858	50741385	17527	Gain
Pinzgauer	PennCNV	19	51163453	51185555	22102	Loss
Pinzgauer	PennCNV	19	51349695	51388333	38638	Loss
Pinzgauer	PennCNV	19	51718265	51760940	42675	Loss
Pinzgauer	PennCNV	19	52007159	52030537	23378	Loss
Pinzgauer	PennCNV	19	52665363	52724512	59149	Loss
Pinzgauer	PennCNV	19	53533045	53545839	12794	Loss
Pinzgauer	PennCNV	19	53884778	53967308	82530	Loss
Pinzgauer	PennCNV	19	55191677	55209217	17540	Loss
Pinzgauer	PennCNV	19	60083050	60103805	20755	Loss
Pinzgauer	PennCNV	19	63344091	63351304	7213	Loss
Pinzgauer	PennCNV	20	19920755	19936569	15814	Gain
Pinzgauer	PennCNV	20	37708943	37714652	5709	Loss
Pinzgauer	PennCNV	20	43238931	43283786	44855	Loss
Pinzgauer	PennCNV	20	45236105	45289013	52908	Gain
Pinzgauer	PennCNV	20	59953440	60045972	92532	Gain
Pinzgauer	PennCNV	20	60429468	60440677	11209	Loss
Pinzgauer	PennCNV	20	60486274	60525562	39288	Gain
Pinzgauer	PennCNV	20	61417909	61421215	3306	Loss
Pinzgauer	PennCNV	20	71193953	71287474	93521	Loss
Pinzgauer	PennCNV	20	71929349	71986227	56878	Both
Pinzgauer	PennCNV	21	5191	351692	346501	Loss
Pinzgauer	PennCNV	21	902295	1854171	951876	Loss
Pinzgauer	PennCNV	21	2855520	2913744	58224	Loss
Pinzgauer	PennCNV	21	3225276	3245487	20211	Loss
Pinzgauer	PennCNV	21	4742351	4757529	15178	Loss
Pinzgauer	PennCNV	21	20540136	20549074	8938	Gain
Pinzgauer	PennCNV	21	35166182	35189178	22996	Gain
Pinzgauer	PennCNV	21	35254566	35258118	3552	Gain
Pinzgauer	PennCNV	21	52308530	52329035	20505	Loss
Pinzgauer	PennCNV	21	52978882	52990840	11958	Loss
Pinzgauer	PennCNV	21	54181213	54196002	14789	Loss
Pinzgauer	PennCNV	21	54563289	54570011	6722	Loss
Pinzgauer	PennCNV	21	59276655	59291824	15169	Gain
Pinzgauer	PennCNV	21	69054857	69070226	15369	Loss
Pinzgauer	PennCNV	22	14640119	14663736	23617	Loss
Pinzgauer	PennCNV	22	20291128	20331448	40320	Loss
Pinzgauer	PennCNV	22	22888039	22890737	2698	Loss
Pinzgauer	PennCNV	22	61316630	61371155	54525	Loss
Pinzgauer	PennCNV	23	471774	538028	66254	Loss
Pinzgauer	PennCNV	23	993247	1025081	31834	Loss
Pinzgauer	PennCNV	23	7655804	7688981	33177	Loss
Pinzgauer	PennCNV	23	16298875	16328792	29917	Loss
Pinzgauer	PennCNV	23	18294438	18331456	37018	Gain
Pinzgauer	PennCNV	23	24222559	24289782	67223	Gain
Pinzgauer	PennCNV	23	25323186	25443589	120403	Both
Pinzgauer	PennCNV	23	25502202	25513202	11000	Loss
Pinzgauer	PennCNV	23	25591536	25632620	41084	Gain
Pinzgauer	PennCNV	23	25669376	25881173	211797	Both
Pinzgauer	PennCNV	23	27850893	27880661	29768	Gain
Pinzgauer	PennCNV	23	28431174	28561217	130043	Both
Pinzgauer	PennCNV	23	28838287	28870776	32489	Gain
Pinzgauer	PennCNV	23	29059352	29079916	20564	Loss
Pinzgauer	PennCNV	23	29266767	29320903	54136	Gain
Pinzgauer	PennCNV	23	29471425	29489851	18426	Loss
Pinzgauer	PennCNV	23	30404750	30443202	38452	Loss
Pinzgauer	PennCNV	23	35566555	35584577	18022	Gain
Pinzgauer	PennCNV	23	40950206	40960837	10631	Loss
Pinzgauer	PennCNV	23	52363277	52458364	95087	Both
Pinzgauer	PennCNV	24	54398	177024	122626	Loss
Pinzgauer	PennCNV	24	6901398	6925491	24093	Gain
Pinzgauer	PennCNV	24	14494725	14525792	31067	Loss
Pinzgauer	PennCNV	24	16218919	16223480	4561	Loss
Pinzgauer	PennCNV	24	17052607	17063489	10882	Loss
Pinzgauer	PennCNV	24	57703805	57706344	2539	Loss
Pinzgauer	PennCNV	25	122631	152895	30264	Loss
Pinzgauer	PennCNV	25	295734	354320	58586	Loss
Pinzgauer	PennCNV	25	481605	750136	268531	Both
Pinzgauer	PennCNV	25	766584	813455	46871	Loss
Pinzgauer	PennCNV	25	1004903	1115021	110118	Loss
Pinzgauer	PennCNV	25	1163955	1197061	33106	Loss
Pinzgauer	PennCNV	25	1471684	1662555	190871	Loss
Pinzgauer	PennCNV	25	2251914	2268837	16923	Loss
Pinzgauer	PennCNV	25	9615561	9662729	47168	Gain
Pinzgauer	PennCNV	25	12913451	12917070	3619	Gain
Pinzgauer	PennCNV	25	18653993	18674448	20455	Both
Pinzgauer	PennCNV	25	33321529	33352790	31261	Loss
Pinzgauer	PennCNV	25	36067715	36094816	27101	Loss
Pinzgauer	PennCNV	25	40416344	40419424	3080	Gain
Pinzgauer	PennCNV	25	40607117	40719483	112366	Loss
Pinzgauer	PennCNV	25	42640462	42663826	23364	Loss
Pinzgauer	PennCNV	26	24079794	24197702	117908	Loss
Pinzgauer	PennCNV	26	25859805	25982293	122488	Loss
Pinzgauer	PennCNV	29	51396010	51502868	106858	Loss
Braunvieh	SVS	1	3212013	3219232	7219	Loss
Braunvieh	SVS	1	14282587	14286165	3578	Loss
Braunvieh	SVS	1	41699421	41703455	4034	Loss
Braunvieh	SVS	1	52119241	52122517	3276	Both
Braunvieh	SVS	1	93730576	93819471	88895	Both
Braunvieh	SVS	1	124142939	124153831	10892	Both
Braunvieh	SVS	1	142409140	142415471	6331	Loss
Braunvieh	SVS	1	143945292	143950853	5561	Loss
Braunvieh	SVS	2	12201336	12207127	5791	Loss
Braunvieh	SVS	2	26297642	26304783	7141	Loss
Braunvieh	SVS	2	27777420	27778824	1404	Loss
Braunvieh	SVS	2	60494001	60501445	7444	Both
Braunvieh	SVS	2	75779286	75783544	4258	Loss
Braunvieh	SVS	2	77189543	77197042	7499	Loss
Braunvieh	SVS	2	78991163	78995249	4086	Loss
Braunvieh	SVS	2	112002528	112007935	5407	Loss
Braunvieh	SVS	2	119488194	119491219	3025	Loss
Braunvieh	SVS	3	2092110	2093487	1377	Loss
Braunvieh	SVS	3	8519849	8533273	13424	Both
Braunvieh	SVS	3	8627110	8655216	28106	Loss
Braunvieh	SVS	3	11782081	11787389	5308	Loss
Braunvieh	SVS	3	14876353	14882132	5779	Loss
Braunvieh	SVS	3	27561830	27564108	2278	Loss
Braunvieh	SVS	3	39387920	39393293	5373	Loss
Braunvieh	SVS	3	47039908	47050012	10104	Both
Braunvieh	SVS	3	67427479	67430758	3279	Loss
Braunvieh	SVS	3	98866452	98873730	7278	Loss
Braunvieh	SVS	3	111765874	111768158	2284	Loss
Braunvieh	SVS	3	114754699	114760668	5969	Loss
Braunvieh	SVS	3	119798022	119806007	7985	Loss
Braunvieh	SVS	4	23915993	23919122	3129	Loss
Braunvieh	SVS	4	29137147	29145165	8018	Loss
Braunvieh	SVS	4	30967507	30976641	9134	Loss
Braunvieh	SVS	4	33530158	33532188	2030	Loss
Braunvieh	SVS	4	43481123	43487686	6563	Loss
Braunvieh	SVS	4	94222355	94226966	4611	Loss
Braunvieh	SVS	4	108225979	108239819	13840	Loss
Braunvieh	SVS	4	109779424	109784918	5494	Loss
Braunvieh	SVS	4	117733111	117753705	20594	Loss
Braunvieh	SVS	5	17125373	17130567	5194	Loss
Braunvieh	SVS	5	59018715	59215089	196374	Both
Braunvieh	SVS	5	103363431	103421894	58463	Loss
Braunvieh	SVS	5	117281795	117524110	242315	Loss
Braunvieh	SVS	5	117533059	117586036	52977	Loss
Braunvieh	SVS	6	28989049	28994000	4951	Both
Braunvieh	SVS	6	53449439	53465381	15942	Both
Braunvieh	SVS	6	58814956	58823326	8370	Loss
Braunvieh	SVS	6	81170090	81186411	16321	Loss
Braunvieh	SVS	6	86136385	86145631	9246	Loss
Braunvieh	SVS	6	93098719	93102624	3905	Loss
Braunvieh	SVS	7	18531324	18566035	34711	Both
Braunvieh	SVS	7	29569259	29627140	57881	Loss
Braunvieh	SVS	7	43087430	43097791	10361	Both
Braunvieh	SVS	7	43492993	43498441	5448	Loss
Braunvieh	SVS	7	44437375	44444959	7584	Both
Braunvieh	SVS	7	74874508	74876275	1767	Loss
Braunvieh	SVS	7	99113453	99116654	3201	Both
Braunvieh	SVS	7	106270192	106287308	17116	Both
Braunvieh	SVS	8	3343762	3359075	15313	Loss
Braunvieh	SVS	8	12459571	12498395	38824	Both
Braunvieh	SVS	8	23471391	23477277	5886	Loss
Braunvieh	SVS	8	26004340	26012483	8143	Loss
Braunvieh	SVS	8	29100768	29103704	2936	Loss
Braunvieh	SVS	8	30478654	30493030	14376	Loss
Braunvieh	SVS	8	32808370	32812525	4155	Loss
Braunvieh	SVS	8	44934828	44944671	9843	Both
Braunvieh	SVS	8	49211989	49215872	3883	Loss
Braunvieh	SVS	8	54265685	54271071	5386	Loss
Braunvieh	SVS	8	63514226	63528210	13984	Loss
Braunvieh	SVS	8	87419048	87425141	6093	Loss
Braunvieh	SVS	8	92022867	92026556	3689	Loss
Braunvieh	SVS	8	95983063	96039953	56890	Loss
Braunvieh	SVS	8	96129918	96181815	51897	Loss
Braunvieh	SVS	8	100531439	100536303	4864	Loss
Braunvieh	SVS	8	105997675	106001959	4284	Loss
Braunvieh	SVS	9	4889983	4906838	16855	Loss
Braunvieh	SVS	9	5610931	5619077	8146	Both
Braunvieh	SVS	10	16662635	16665097	2462	Both
Braunvieh	SVS	10	23203395	23222741	19346	Both
Braunvieh	SVS	10	23231567	24057642	826075	Loss
Braunvieh	SVS	10	24061376	24095827	34451	Both
Braunvieh	SVS	10	28134809	28140356	5547	Loss
Braunvieh	SVS	11	787079	796403	9324	Loss
Braunvieh	SVS	11	8724175	8737561	13386	Loss
Braunvieh	SVS	11	25451864	25461242	9378	Loss
Braunvieh	SVS	11	31574461	31587891	13430	Loss
Braunvieh	SVS	11	36295107	36306761	11654	Loss
Braunvieh	SVS	11	39094818	39104584	9766	Loss
Braunvieh	SVS	11	39806980	39810730	3750	Loss
Braunvieh	SVS	11	45110719	45113092	2373	Loss
Braunvieh	SVS	11	47034705	47059328	24623	Loss
Braunvieh	SVS	11	65686532	65694352	7820	Loss
Braunvieh	SVS	11	80275230	80277230	2000	Loss
Braunvieh	SVS	11	86226268	86238905	12637	Loss
Braunvieh	SVS	11	93188055	93190178	2123	Loss
Braunvieh	SVS	11	96160234	96166874	6640	Loss
Braunvieh	SVS	12	70363408	70458250	94842	Both
Braunvieh	SVS	12	71264466	71286946	22480	Both
Braunvieh	SVS	12	71291648	72509035	1217387	Loss
Braunvieh	SVS	12	72511101	72742881	231780	Both
Braunvieh	SVS	12	72748544	72814919	66375	Both
Braunvieh	SVS	12	72819475	73765388	945913	Loss
Braunvieh	SVS	12	73767537	73779660	12123	Loss
Braunvieh	SVS	12	73804467	74828682	1024215	Loss
Braunvieh	SVS	12	74840021	75193156	353135	Both
Braunvieh	SVS	12	78494480	78498214	3734	Both
Braunvieh	SVS	13	16984321	16993531	9210	Loss
Braunvieh	SVS	13	53933240	53982995	49755	Loss
Braunvieh	SVS	13	70490947	70497641	6694	Loss
Braunvieh	SVS	14	17329297	17336372	7075	Both
Braunvieh	SVS	14	38822137	38832908	10771	Loss
Braunvieh	SVS	14	51552050	51558631	6581	Loss
Braunvieh	SVS	14	57421575	57424275	2700	Loss
Braunvieh	SVS	14	68618033	68620692	2659	Both
Braunvieh	SVS	14	78332048	78386690	54642	Loss
Braunvieh	SVS	14	80486140	80488797	2657	Loss
Braunvieh	SVS	14	82508753	82514246	5493	Loss
Braunvieh	SVS	15	15764194	15773838	9644	Both
Braunvieh	SVS	15	31858689	31866765	8076	Loss
Braunvieh	SVS	15	48011891	48039946	28055	Both
Braunvieh	SVS	16	8582055	8584573	2518	Both
Braunvieh	SVS	16	8594503	8623933	29430	Loss
Braunvieh	SVS	16	15146573	15243100	96527	Loss
Braunvieh	SVS	16	26570767	26576687	5920	Loss
Braunvieh	SVS	16	29822482	29828756	6274	Loss
Braunvieh	SVS	16	54278254	54284290	6036	Both
Braunvieh	SVS	16	70287549	70297857	10308	Loss
Braunvieh	SVS	16	78033206	78036697	3491	Loss
Braunvieh	SVS	17	15312058	15323253	11195	Loss
Braunvieh	SVS	17	28406300	28408676	2376	Both
Braunvieh	SVS	17	39032667	39038621	5954	Loss
Braunvieh	SVS	17	54855299	54856902	1603	Loss
Braunvieh	SVS	17	72038421	72044101	5680	Both
Braunvieh	SVS	18	61674257	61768443	94186	Loss
Braunvieh	SVS	18	61781777	61835029	53252	Both
Braunvieh	SVS	18	61894649	61909540	14891	Loss
Braunvieh	SVS	19	2709932	2718995	9063	Loss
Braunvieh	SVS	19	5915322	5918003	2681	Loss
Braunvieh	SVS	19	14601910	14606603	4693	Loss
Braunvieh	SVS	19	19842405	19863512	21107	Both
Braunvieh	SVS	19	25006488	25008419	1931	Loss
Braunvieh	SVS	19	46079413	46086725	7312	Loss
Braunvieh	SVS	19	57551271	57557142	5871	Loss
Braunvieh	SVS	20	16402419	16407292	4873	Loss
Braunvieh	SVS	20	22960402	22970215	9813	Loss
Braunvieh	SVS	20	45468918	45478345	9427	Loss
Braunvieh	SVS	20	60520636	60522410	1774	Both
Braunvieh	SVS	20	69996891	69998691	1800	Loss
Braunvieh	SVS	21	2719823	2732096	12273	Loss
Braunvieh	SVS	21	20104871	20129619	24748	Loss
Braunvieh	SVS	21	20331027	20335407	4380	Both
Braunvieh	SVS	21	37429328	37446859	17531	Loss
Braunvieh	SVS	21	40615650	40617106	1456	Loss
Braunvieh	SVS	22	7691343	7705399	14056	Loss
Braunvieh	SVS	22	19404955	19409002	4047	Both
Braunvieh	SVS	22	22133344	22137912	4568	Loss
Braunvieh	SVS	22	26467884	26473227	5343	Both
Braunvieh	SVS	22	33844736	33852033	7297	Loss
Braunvieh	SVS	22	40634656	40643631	8975	Loss
Braunvieh	SVS	23	557106	578821	21715	Loss
Braunvieh	SVS	23	25341782	25369399	27617	Both
Braunvieh	SVS	23	29788998	29808818	19820	Both
Braunvieh	SVS	24	8602484	8604815	2331	Loss
Braunvieh	SVS	24	17028792	17040399	11607	Loss
Braunvieh	SVS	24	21546705	21548736	2031	Loss
Braunvieh	SVS	24	52869903	52881826	11923	Loss
Braunvieh	SVS	24	62431830	62448399	16569	Loss
Braunvieh	SVS	26	2455694	2473104	17410	Loss
Braunvieh	SVS	26	28002667	28012143	9476	Loss
Braunvieh	SVS	26	34296519	34299839	3320	Loss
Braunvieh	SVS	26	36567499	36581173	13674	Loss
Braunvieh	SVS	26	47357981	47360016	2035	Loss
Braunvieh	SVS	27	12426617	12427703	1086	Loss
Braunvieh	SVS	27	15455889	15457883	1994	Loss
Braunvieh	SVS	27	33811841	33814542	2701	Loss
Braunvieh	SVS	27	39084303	39086638	2335	Loss
Braunvieh	SVS	28	2384080	2386891	2811	Both
Braunvieh	SVS	28	2468624	2638563	169939	Both
Braunvieh	SVS	28	2814450	2860512	46062	Both
Braunvieh	SVS	28	42721881	42728739	6858	Loss
Braunvieh	SVS	29	5432640	5452376	19736	Loss
Braunvieh	SVS	29	9137096	9138628	1532	Loss
Braunvieh	SVS	29	12360004	12367965	7961	Loss
Braunvieh	SVS	29	17453455	17455284	1829	Loss
Braunvieh	SVS	29	24014819	24021977	7158	Loss
Braunvieh	SVS	29	26399164	26403585	4421	Both
Braunvieh	SVS	29	47595658	47603362	7704	Loss
Grauvieh	SVS	1	14282587	14286165	3578	Loss
Grauvieh	SVS	1	41703455	41705925	2470	Loss
Grauvieh	SVS	1	75987278	76045397	58119	Loss
Grauvieh	SVS	1	93730576	93819471	88895	Loss
Grauvieh	SVS	1	124142939	124153831	10892	Both
Grauvieh	SVS	2	4342812	4347051	4239	Loss
Grauvieh	SVS	2	12207127	12218777	11650	Loss
Grauvieh	SVS	2	27774208	27777423	3215	Loss
Grauvieh	SVS	2	60494001	60501445	7444	Loss
Grauvieh	SVS	2	61890196	61892005	1809	Loss
Grauvieh	SVS	2	75779286	75783544	4258	Loss
Grauvieh	SVS	2	84333617	84344636	11019	Loss
Grauvieh	SVS	2	90547399	90549594	2195	Loss
Grauvieh	SVS	2	104823684	105011773	188089	Loss
Grauvieh	SVS	2	112600410	112602862	2452	Loss
Grauvieh	SVS	2	115322601	115354397	31796	Loss
Grauvieh	SVS	2	119488194	119491219	3025	Loss
Grauvieh	SVS	2	120886857	120892540	5683	Loss
Grauvieh	SVS	3	8519849	8529126	9277	Both
Grauvieh	SVS	3	11782579	11807340	24761	Loss
Grauvieh	SVS	3	27560971	27562661	1690	Loss
Grauvieh	SVS	3	54382375	54532794	150419	Both
Grauvieh	SVS	3	74625359	74632014	6655	Loss
Grauvieh	SVS	3	102104910	102106445	1535	Loss
Grauvieh	SVS	3	105711958	105720505	8547	Both
Grauvieh	SVS	4	29137147	29145165	8018	Loss
Grauvieh	SVS	4	108228442	108252635	24193	Loss
Grauvieh	SVS	5	5626620	5638151	11531	Loss
Grauvieh	SVS	5	44531136	44541996	10860	Loss
Grauvieh	SVS	5	58992818	59215089	222271	Loss
Grauvieh	SVS	5	102606232	102649492	43260	Loss
Grauvieh	SVS	5	103363431	103440599	77168	Both
Grauvieh	SVS	5	117524110	117586036	61926	Loss
Grauvieh	SVS	6	1074664	1100413	25749	Loss
Grauvieh	SVS	6	58814956	58823326	8370	Loss
Grauvieh	SVS	6	81170090	81186411	16321	Loss
Grauvieh	SVS	6	86136385	86145631	9246	Loss
Grauvieh	SVS	7	9481518	9488262	6744	Both
Grauvieh	SVS	7	18531324	18566035	34711	Both
Grauvieh	SVS	7	29569259	29627140	57881	Loss
Grauvieh	SVS	7	31290398	31302349	11951	Loss
Grauvieh	SVS	7	43487164	43498441	11277	Both
Grauvieh	SVS	7	44437375	44444959	7584	Both
Grauvieh	SVS	7	64613425	64618907	5482	Both
Grauvieh	SVS	7	83349278	83353315	4037	Loss
Grauvieh	SVS	7	106282104	106295135	13031	Loss
Grauvieh	SVS	8	3343762	3359075	15313	Loss
Grauvieh	SVS	8	12459571	12498395	38824	Both
Grauvieh	SVS	8	16976271	16982295	6024	Loss
Grauvieh	SVS	8	22935250	22957313	22063	Both
Grauvieh	SVS	8	29917998	29920136	2138	Loss
Grauvieh	SVS	8	44934828	44944671	9843	Both
Grauvieh	SVS	8	49211989	49215872	3883	Loss
Grauvieh	SVS	8	59206614	59212404	5790	Loss
Grauvieh	SVS	8	92022867	92026556	3689	Loss
Grauvieh	SVS	8	96129918	96181815	51897	Loss
Grauvieh	SVS	9	6437384	6451983	14599	Loss
Grauvieh	SVS	9	69527371	69536017	8646	Both
Grauvieh	SVS	10	11739822	11750954	11132	Loss
Grauvieh	SVS	10	23180741	23222741	42000	Both
Grauvieh	SVS	10	23231567	24057642	826075	Loss
Grauvieh	SVS	10	24061376	24143260	81884	Both
Grauvieh	SVS	10	41584872	41596729	11857	Both
Grauvieh	SVS	10	43863709	43865078	1369	Loss
Grauvieh	SVS	11	29629569	29631697	2128	Loss
Grauvieh	SVS	11	36295107	36306761	11654	Loss
Grauvieh	SVS	11	69357111	69374266	17155	Both
Grauvieh	SVS	11	103096174	107306361	4210187	Loss
Grauvieh	SVS	12	936045	944850	8805	Both
Grauvieh	SVS	12	70435829	70458250	22421	Loss
Grauvieh	SVS	12	70483913	71274536	790623	Loss
Grauvieh	SVS	12	71276445	72042304	765859	Loss
Grauvieh	SVS	12	72511101	72742881	231780	Loss
Grauvieh	SVS	12	72748544	72966110	217566	Loss
Grauvieh	SVS	12	73001857	73497775	495918	Loss
Grauvieh	SVS	12	73516942	73564769	47827	Both
Grauvieh	SVS	12	73583291	74828682	1245391	Loss
Grauvieh	SVS	12	74840021	75211295	371274	Loss
Grauvieh	SVS	12	75238779	75502589	263810	Loss
Grauvieh	SVS	12	75509052	76196284	687232	Loss
Grauvieh	SVS	13	16975108	16984321	9213	Loss
Grauvieh	SVS	13	53858853	53862891	4038	Loss
Grauvieh	SVS	13	53934586	53982995	48409	Loss
Grauvieh	SVS	14	17329297	17336372	7075	Both
Grauvieh	SVS	14	30526468	30536361	9893	Loss
Grauvieh	SVS	14	54123146	54126508	3362	Both
Grauvieh	SVS	14	54809641	54833610	23969	Loss
Grauvieh	SVS	14	73444300	73450522	6222	Loss
Grauvieh	SVS	15	14733277	14736168	2891	Loss
Grauvieh	SVS	15	15764194	15773838	9644	Loss
Grauvieh	SVS	15	31858689	31866765	8076	Loss
Grauvieh	SVS	15	47819771	47845001	25230	Loss
Grauvieh	SVS	15	50629207	50636211	7004	Loss
Grauvieh	SVS	15	54087998	54090285	2287	Loss
Grauvieh	SVS	15	80511026	80831076	320050	Loss
Grauvieh	SVS	15	81301329	81308681	7352	Both
Grauvieh	SVS	16	15757248	15763906	6658	Loss
Grauvieh	SVS	16	70287549	70297857	10308	Loss
Grauvieh	SVS	16	79852868	79855046	2178	Both
Grauvieh	SVS	17	72858779	72906883	48104	Loss
Grauvieh	SVS	17	72929942	75148791	2218849	Loss
Grauvieh	SVS	18	61655052	61680325	25273	Loss
Grauvieh	SVS	18	61699066	61768443	69377	Loss
Grauvieh	SVS	18	61781777	61835029	53252	Loss
Grauvieh	SVS	18	61894649	61918012	23363	Both
Grauvieh	SVS	19	2575861	2604934	29073	Both
Grauvieh	SVS	19	5915322	5918003	2681	Loss
Grauvieh	SVS	19	14601910	14606603	4693	Loss
Grauvieh	SVS	19	20156929	20162050	5121	Both
Grauvieh	SVS	19	25004434	25006488	2054	Loss
Grauvieh	SVS	19	39159081	39162701	3620	Loss
Grauvieh	SVS	19	51035766	51044818	9052	Loss
Grauvieh	SVS	19	56834175	56843503	9328	Loss
Grauvieh	SVS	20	1339458	1343725	4267	Loss
Grauvieh	SVS	20	17078414	17092908	14494	Loss
Grauvieh	SVS	20	29738124	29747073	8949	Loss
Grauvieh	SVS	20	49814675	49834503	19828	Loss
Grauvieh	SVS	20	60520636	60522410	1774	Both
Grauvieh	SVS	21	9486451	9491629	5178	Loss
Grauvieh	SVS	21	20104871	20164126	59255	Loss
Grauvieh	SVS	21	40615650	40617106	1456	Loss
Grauvieh	SVS	21	52305970	52329035	23065	Loss
Grauvieh	SVS	21	54181213	54196002	14789	Loss
Grauvieh	SVS	22	22135070	22142383	7313	Both
Grauvieh	SVS	22	40643631	40669575	25944	Loss
Grauvieh	SVS	22	41703903	41709601	5698	Both
Grauvieh	SVS	23	7083511	7110372	26861	Loss
Grauvieh	SVS	23	25341782	25361041	19259	Both
Grauvieh	SVS	23	25369399	25442124	72725	Both
Grauvieh	SVS	23	25692022	25841519	149497	Both
Grauvieh	SVS	23	25846520	25875898	29378	Loss
Grauvieh	SVS	23	25881173	26533391	652218	Both
Grauvieh	SVS	23	26573605	26627782	54177	Both
Grauvieh	SVS	23	28828468	28849820	21352	Both
Grauvieh	SVS	23	29041704	29096015	54311	Loss
Grauvieh	SVS	23	29775945	29808818	32873	Loss
Grauvieh	SVS	24	21546705	21548736	2031	Loss
Grauvieh	SVS	24	32647730	32654189	6459	Loss
Grauvieh	SVS	24	62411069	62426579	15510	Both
Grauvieh	SVS	24	62431830	62448399	16569	Loss
Grauvieh	SVS	25	25945	2581861	2555916	Loss
Grauvieh	SVS	25	5630690	5632674	1984	Loss
Grauvieh	SVS	26	2455694	2473104	17410	Loss
Grauvieh	SVS	26	28713575	28802987	89412	Loss
Grauvieh	SVS	26	34296519	34299839	3320	Both
Grauvieh	SVS	27	771605	775046	3441	Loss
Grauvieh	SVS	27	39085707	39088430	2723	Loss
Grauvieh	SVS	27	44888791	44890287	1496	Loss
Grauvieh	SVS	28	2538813	2860512	321699	Loss
Grauvieh	SVS	28	44286087	44292969	6882	Loss
Grauvieh	SVS	29	17437323	17439177	1854	Loss
Grauvieh	SVS	29	27341730	27428150	86420	Loss
Grauvieh	SVS	29	49922377	51502868	1580491	Loss
Pinzgauer	SVS	1	3657416	3665808	8392	Loss
Pinzgauer	SVS	1	24077378	24081036	3658	Both
Pinzgauer	SVS	1	42582501	42594240	11739	Loss
Pinzgauer	SVS	1	52772080	52777745	5665	Loss
Pinzgauer	SVS	1	57646505	57655109	8604	Loss
Pinzgauer	SVS	1	75987278	76045397	58119	Loss
Pinzgauer	SVS	1	93730576	93819471	88895	Loss
Pinzgauer	SVS	1	124142939	124153831	10892	Both
Pinzgauer	SVS	1	125902322	125908455	6133	Loss
Pinzgauer	SVS	1	137433837	137444226	10389	Loss
Pinzgauer	SVS	1	142415471	142425137	9666	Loss
Pinzgauer	SVS	1	154303586	154309503	5917	Loss
Pinzgauer	SVS	2	5440067	5457982	17915	Loss
Pinzgauer	SVS	2	12207127	12218777	11650	Loss
Pinzgauer	SVS	2	27777423	27782876	5453	Loss
Pinzgauer	SVS	2	41045923	41047589	1666	Loss
Pinzgauer	SVS	2	45585488	45591707	6219	Loss
Pinzgauer	SVS	2	60494001	60501445	7444	Loss
Pinzgauer	SVS	2	61890196	61892005	1809	Both
Pinzgauer	SVS	2	84333617	84344636	11019	Loss
Pinzgauer	SVS	2	98508373	98518278	9905	Both
Pinzgauer	SVS	2	104823684	105011773	188089	Loss
Pinzgauer	SVS	2	112600410	112602862	2452	Both
Pinzgauer	SVS	2	119488194	119491219	3025	Loss
Pinzgauer	SVS	2	120886857	120892540	5683	Loss
Pinzgauer	SVS	3	8519849	8533273	13424	Loss
Pinzgauer	SVS	3	11782579	11807340	24761	Loss
Pinzgauer	SVS	3	47039908	47050012	10104	Both
Pinzgauer	SVS	3	74625359	74632014	6655	Loss
Pinzgauer	SVS	3	105711958	105720505	8547	Both
Pinzgauer	SVS	4	29137147	29145165	8018	Loss
Pinzgauer	SVS	4	69884582	69894007	9425	Loss
Pinzgauer	SVS	4	85615679	85923262	307583	Gain
Pinzgauer	SVS	4	108228442	108252635	24193	Loss
Pinzgauer	SVS	4	117733111	117753705	20594	Loss
Pinzgauer	SVS	5	5626620	5638151	11531	Loss
Pinzgauer	SVS	5	42196029	42197319	1290	Loss
Pinzgauer	SVS	5	44531136	44541996	10860	Both
Pinzgauer	SVS	5	59018715	59215089	196374	Loss
Pinzgauer	SVS	5	102606232	102649492	43260	Loss
Pinzgauer	SVS	5	117281795	117524110	242315	Both
Pinzgauer	SVS	5	117533059	117586036	52977	Loss
Pinzgauer	SVS	6	28989049	28994000	4951	Loss
Pinzgauer	SVS	6	72075063	72077236	2173	Loss
Pinzgauer	SVS	6	81170090	81186411	16321	Loss
Pinzgauer	SVS	6	86136385	86145631	9246	Both
Pinzgauer	SVS	7	6250047	6270638	20591	Loss
Pinzgauer	SVS	7	9481518	9488262	6744	Loss
Pinzgauer	SVS	7	10274076	11091861	817785	Loss
Pinzgauer	SVS	7	18531324	18566035	34711	Both
Pinzgauer	SVS	7	23750763	23755451	4688	Both
Pinzgauer	SVS	7	31290398	31302349	11951	Loss
Pinzgauer	SVS	7	43087430	43097791	10361	Both
Pinzgauer	SVS	7	43492993	43498441	5448	Both
Pinzgauer	SVS	7	64613425	64618907	5482	Loss
Pinzgauer	SVS	7	83349278	83353315	4037	Loss
Pinzgauer	SVS	7	87918080	87949636	31556	Loss
Pinzgauer	SVS	7	106282104	106295135	13031	Both
Pinzgauer	SVS	8	12459571	12498395	38824	Both
Pinzgauer	SVS	8	30478654	30493030	14376	Loss
Pinzgauer	SVS	8	42063994	42067803	3809	Loss
Pinzgauer	SVS	8	44934828	44944671	9843	Both
Pinzgauer	SVS	8	92022867	92026556	3689	Loss
Pinzgauer	SVS	8	96129918	96181815	51897	Loss
Pinzgauer	SVS	9	4889983	4906838	16855	Both
Pinzgauer	SVS	9	5972581	5981648	9067	Both
Pinzgauer	SVS	9	69527371	69536017	8646	Both
Pinzgauer	SVS	10	23180741	23222741	42000	Both
Pinzgauer	SVS	10	23231567	24057642	826075	Loss
Pinzgauer	SVS	10	24061376	24095827	34451	Both
Pinzgauer	SVS	10	43863709	43865078	1369	Both
Pinzgauer	SVS	11	29417529	29423228	5699	Loss
Pinzgauer	SVS	11	36295107	36306761	11654	Loss
Pinzgauer	SVS	11	69357111	69374266	17155	Loss
Pinzgauer	SVS	11	93489896	93493306	3410	Both
Pinzgauer	SVS	12	936045	944850	8805	Both
Pinzgauer	SVS	12	70435829	70444997	9168	Both
Pinzgauer	SVS	12	70451847	71399213	947366	Loss
Pinzgauer	SVS	12	71411993	72042304	630311	Loss
Pinzgauer	SVS	12	72058027	72419043	361016	Loss
Pinzgauer	SVS	12	72432362	72509035	76673	Loss
Pinzgauer	SVS	12	72511101	72814919	303818	Both
Pinzgauer	SVS	12	72819475	73497775	678300	Loss
Pinzgauer	SVS	12	73516942	74828682	1311740	Loss
Pinzgauer	SVS	12	74840021	75193156	353135	Loss
Pinzgauer	SVS	13	6073410	6079879	6469	Loss
Pinzgauer	SVS	13	16975108	16984321	9213	Loss
Pinzgauer	SVS	13	53933240	53982995	49755	Loss
Pinzgauer	SVS	14	5308490	5312441	3951	Loss
Pinzgauer	SVS	14	11247555	11250157	2602	Loss
Pinzgauer	SVS	14	17329297	17336372	7075	Both
Pinzgauer	SVS	14	29268102	29269799	1697	Loss
Pinzgauer	SVS	14	38825492	38835981	10489	Loss
Pinzgauer	SVS	14	51554288	51563244	8956	Loss
Pinzgauer	SVS	14	54123146	54126508	3362	Both
Pinzgauer	SVS	14	57558336	57565742	7406	Both
Pinzgauer	SVS	14	68619030	68621587	2557	Loss
Pinzgauer	SVS	14	82508753	82514246	5493	Loss
Pinzgauer	SVS	15	11374141	11388165	14024	Loss
Pinzgauer	SVS	15	14733277	14736168	2891	Loss
Pinzgauer	SVS	15	31858689	31866765	8076	Loss
Pinzgauer	SVS	15	47819771	47845001	25230	Both
Pinzgauer	SVS	15	50729593	50744716	15123	Both
Pinzgauer	SVS	15	54087998	54090285	2287	Loss
Pinzgauer	SVS	15	79612403	79619775	7372	Both
Pinzgauer	SVS	15	80511026	80831076	320050	Both
Pinzgauer	SVS	15	81301329	81308681	7352	Both
Pinzgauer	SVS	16	5738701	5743889	5188	Loss
Pinzgauer	SVS	17	3031860	3038217	6357	Loss
Pinzgauer	SVS	17	6094232	6096279	2047	Loss
Pinzgauer	SVS	17	15312058	15323253	11195	Loss
Pinzgauer	SVS	17	21085057	21105684	20627	Loss
Pinzgauer	SVS	17	27735383	27738381	2998	Loss
Pinzgauer	SVS	17	39027634	39032667	5033	Loss
Pinzgauer	SVS	17	40187015	40188531	1516	Loss
Pinzgauer	SVS	17	50553089	50585169	32080	Both
Pinzgauer	SVS	17	54855299	54856902	1603	Loss
Pinzgauer	SVS	17	57594773	57599454	4681	Loss
Pinzgauer	SVS	17	72936768	72941663	4895	Loss
Pinzgauer	SVS	18	61655052	61680325	25273	Loss
Pinzgauer	SVS	18	61699066	61894649	195583	Loss
Pinzgauer	SVS	18	61898550	61918012	19462	Both
Pinzgauer	SVS	19	2599454	2609059	9605	Loss
Pinzgauer	SVS	19	19842405	19863512	21107	Both
Pinzgauer	SVS	19	25004434	25006488	2054	Loss
Pinzgauer	SVS	19	39160371	39166284	5913	Loss
Pinzgauer	SVS	19	46079413	46086725	7312	Loss
Pinzgauer	SVS	19	56830067	56837932	7865	Loss
Pinzgauer	SVS	20	17075769	17086327	10558	Loss
Pinzgauer	SVS	20	45468918	45478345	9427	Loss
Pinzgauer	SVS	20	49814675	49834503	19828	Loss
Pinzgauer	SVS	20	53702836	53710914	8078	Both
Pinzgauer	SVS	20	60520636	60522410	1774	Both
Pinzgauer	SVS	20	69995722	69996891	1169	Loss
Pinzgauer	SVS	21	9486451	9491629	5178	Loss
Pinzgauer	SVS	21	20104871	20129619	24748	Both
Pinzgauer	SVS	21	20331027	20335407	4380	Both
Pinzgauer	SVS	21	22960260	22964949	4689	Loss
Pinzgauer	SVS	21	33714857	33721949	7092	Both
Pinzgauer	SVS	21	34142405	34152320	9915	Loss
Pinzgauer	SVS	21	40611462	40616911	5449	Loss
Pinzgauer	SVS	21	52305970	52329035	23065	Loss
Pinzgauer	SVS	21	54181213	54196002	14789	Loss
Pinzgauer	SVS	22	33844736	33852033	7297	Both
Pinzgauer	SVS	23	25341782	25369399	27617	Both
Pinzgauer	SVS	23	25407755	25442124	34369	Both
Pinzgauer	SVS	23	25846520	25875898	29378	Both
Pinzgauer	SVS	23	28448873	28469826	20953	Both
Pinzgauer	SVS	23	28828468	28849820	21352	Both
Pinzgauer	SVS	23	29041704	29096015	54311	Loss
Pinzgauer	SVS	23	29788998	29808818	19820	Both
Pinzgauer	SVS	24	21546705	21548736	2031	Loss
Pinzgauer	SVS	24	32647730	32654189	6459	Loss
Pinzgauer	SVS	24	46611081	46614395	3314	Loss
Pinzgauer	SVS	24	62367272	62426579	59307	Both
Pinzgauer	SVS	24	62431830	62448399	16569	Both
Pinzgauer	SVS	25	2306032	2323305	17273	Loss
Pinzgauer	SVS	25	5630690	5632674	1984	Loss
Pinzgauer	SVS	25	18293604	18300769	7165	Loss
Pinzgauer	SVS	25	40421523	40424187	2664	Loss
Pinzgauer	SVS	26	34296519	34299839	3320	Both
Pinzgauer	SVS	27	12422919	12426618	3699	Both
Pinzgauer	SVS	27	38033156	38034786	1630	Loss
Pinzgauer	SVS	28	1644820	1648309	3489	Both
Pinzgauer	SVS	28	2468624	2638563	169939	Both
Pinzgauer	SVS	28	2665025	2808023	142998	Loss
Pinzgauer	SVS	28	2814450	2860512	46062	Both
Pinzgauer	SVS	28	4638738	4642556	3818	Loss
Pinzgauer	SVS	28	22701867	22711518	9651	Both
Pinzgauer	SVS	28	29089552	29091998	2446	Loss
Pinzgauer	SVS	28	44291071	44299843	8772	Loss
Pinzgauer	SVS	29	5432640	5452376	19736	Loss
Pinzgauer	SVS	29	9137096	9138628	1532	Loss
Pinzgauer	SVS	29	12360004	12367965	7961	Loss
Pinzgauer	SVS	29	17439177	17441041	1864	Loss
Pinzgauer	SVS	29	23970782	23973094	2312	Loss
Pinzgauer	SVS	29	28721541	28725035	3494	Loss
Pinzgauer	SVS	29	32788669	32794203	5534	Loss
Braunvieh	Consensus	2	27777420	27778824	1404	Both
Braunvieh	Consensus	5	59018715	59189160	170445	Both
Braunvieh	Consensus	5	117533059	117586036	52977	Both
Braunvieh	Consensus	5	117281795	117524110	242315	Both
Braunvieh	Consensus	7	18531324	18566035	34711	Both
Braunvieh	Consensus	7	29569259	29627140	57881	Loss
Braunvieh	Consensus	7	43087430	43097791	10361	Both
Braunvieh	Consensus	7	99113453	99116654	3201	Both
Braunvieh	Consensus	8	12459571	12498395	38824	Both
Braunvieh	Consensus	8	95983063	96030824	47761	Loss
Braunvieh	Consensus	8	96129918	96181815	51897	Loss
Braunvieh	Consensus	9	5610931	5619077	8146	Both
Braunvieh	Consensus	10	23319458	23854403	534945	Both
Braunvieh	Consensus	12	71264466	71286946	22480	Both
Braunvieh	Consensus	12	71291648	72042304	750656	Both
Braunvieh	Consensus	12	72174261	72264806	90545	Loss
Braunvieh	Consensus	12	72748544	72814919	66375	Both
Braunvieh	Consensus	12	73767537	73779660	12123	Both
Braunvieh	Consensus	12	72511101	72742881	231780	Both
Braunvieh	Consensus	12	72432362	72509035	76673	Both
Braunvieh	Consensus	12	72819475	73765388	945913	Both
Braunvieh	Consensus	12	74840021	75193156	353135	Both
Braunvieh	Consensus	12	74327005	74828682	501677	Both
Braunvieh	Consensus	13	53938383	53982995	44612	Loss
Braunvieh	Consensus	14	78332048	78386690	54642	Loss
Braunvieh	Consensus	18	61781777	61835029	53252	Both
Braunvieh	Consensus	19	2709932	2718995	9063	Loss
Braunvieh	Consensus	19	14601910	14606603	4693	Loss
Braunvieh	Consensus	21	20104871	20129619	24748	Loss
Braunvieh	Consensus	23	25341782	25369399	27617	Both
Grauvieh	Consensus	1	75993310	76045397	52087	Loss
Grauvieh	Consensus	2	104825968	105011773	185805	Loss
Grauvieh	Consensus	3	105711958	105720505	8547	Both
Grauvieh	Consensus	5	5626620	5638151	11531	Loss
Grauvieh	Consensus	5	59018715	59207218	188503	Loss
Grauvieh	Consensus	5	103363431	103405395	41964	Both
Grauvieh	Consensus	5	117524110	117586036	61926	Both
Grauvieh	Consensus	6	1074664	1100413	25749	Loss
Grauvieh	Consensus	7	29573262	29627140	53878	Loss
[truncated: 112 more rows]

## Sheet: Table S4
Table S4
The details of the positions of individual ROH islands, proportions of individuals with CNVs at each marker and the proportion of inbred individuals and percentage of individuals with copy gain or loss within each ROH island.
			ROH island					CNVR				Proportions within ROH island			Intersection			Proportions within intersection
Breed	Software	Chromosome	ID	Start	End	Length	IMD	Start	End	Length	Copy state	ROH	Copy gain	Copy loss	Start	End	Length	ROH	Copy gain	Copy loss	imdi	Event	Event2
Brown Swiss	PennCNV	5	ROH05	16600378	19830701	3230323	3.772					58.18	0	0								None
Brown Swiss	PennCNV	5	ROH07	75543085	77205976	1662891	3.887					64.9	0	0								None
Brown Swiss	PennCNV	6	ROH08	5238677	6697815	1459138	28.632					74.4	0	0								Gap	Gap
Brown Swiss	PennCNV	6	ROH09	32432759	34215534	1782775	3.28					59.18	0	0								None
Brown Swiss	PennCNV	6	ROH10	38281115	39821580	1540465	3.344					85.62	0	0								None
Brown Swiss	PennCNV	6	ROH11	49485001	49542605	57604	4.535					48.65	0	0								None
Brown Swiss	PennCNV	6	ROH15	89145527	92887063	3741536	3.232					48.27	0	0								None
Brown Swiss	PennCNV	7	ROH17	51178057	52533653	1355596	4.844					55.81	0	0								None
Brown Swiss	PennCNV	10	ROH24	23889533	24998515	1108982	28.039	24766755	24998515	231760	Loss	60.03	0	1.07	24766755	24998515	231760	56.04	0	7.1	40.392	Gap + Loss	Both
Brown Swiss	PennCNV	12	ROH28	72432362	72467225	34863	6.883	72432362	73779660	1347298	Both	48.78	0	9.76	72432362	72467225	34863	48.78	0	9.76	6.883	Gain + Loss	CNV
Brown Swiss	PennCNV	16	ROH33	22077094	28701552	6624458	3.424					50.95	0	0								None
Brown Swiss	PennCNV	19	ROH37	45995134	48022931	2027797	4.201	47366560	47407572	41012	Both	48.73	0.26	0.41	47366560	47407572	41012	48.96	2.08	2.58	2.653	Gain + Loss	CNV
Brown Swiss	PennCNV	19	ROH37	45995134	48022931	2027797	4.201	46096253	46221220	124967	Both	48.73	0.26	0.41	46096253	46221220	124967	49.1	1.8	2.58	4.727	Gain + Loss	CNV
Brown Swiss	PennCNV	19	ROH37	45995134	48022931	2027797	4.201	47048084	47236540	188456	Both	48.73	0.26	0.41	47048084	47236540	188456	49.4	1.53	2.92	6.403	Gain + Loss	CNV
Brown Swiss	PennCNV	25	ROH42	817031	2827677	2010646	3.716	1365841	1421106	55265	Both	52.6	0.33	0.56	1365841	1421106	55265	51.67	1.83	2.58	4.24	Gain + Loss	CNV
Brown Swiss	PennCNV	25	ROH42	817031	2827677	2010646	3.716	1481116	1733311	252195	Loss	52.6	0.33	0.56	1481116	1733311	252195	55.26	0	2.63	5.942	Loss	CNV
Brown Swiss	PennCNV	25	ROH42	817031	2827677	2010646	3.716	1822299	1854547	32248	Loss	52.6	0.33	0.56	1822299	1854547	32248	52.63	0	2.63	3.385	Loss	CNV
Brown Swiss	PennCNV	25	ROH42	817031	2827677	2010646	3.716	1011670	1136413	124743	Gain	52.6	0.33	0.56	1011670	1136413	124743	52.21	3.41	0	2.922	Gain	CNV
Brown Swiss	PennCNV	25	ROH42	817031	2827677	2010646	3.716	2043252	2157940	114688	Loss	52.6	0.33	0.56	2043252	2157940	114688	55.26	0	2.63	2.495	Loss	CNV
Brown Swiss	SVS	5	ROH05	16600378	19830701	3230323	3.772	17125373	17130567	5194	Loss	58.18	0	0.15	17125373	17130567	5194	67.19	0	42.19	1.928	Loss	CNV
Brown Swiss	SVS	5	ROH07	75543085	77205976	1662891	3.887					64.9	0	0								None
Brown Swiss	SVS	6	ROH08	5238677	6697815	1459138	28.632					74.4	0	0								Gap	Gap
Brown Swiss	SVS	6	ROH09	32432759	34215534	1782775	3.28					59.18	0	0								None
Brown Swiss	SVS	6	ROH10	38281115	39821580	1540465	3.344					85.62	0	0								None
Brown Swiss	SVS	6	ROH11	49485001	49542605	57604	4.535					48.65	0	0								None
Brown Swiss	SVS	6	ROH15	89145527	92887063	3741536	3.232					48.27	0	0								None
Brown Swiss	SVS	7	ROH17	51178057	52533653	1355596	4.844					55.81	0	0								None
Brown Swiss	SVS	10	ROH24	23889533	24998515	1108982	28.039	24061376	24095827	34451	Both	58.43	0.34	6.52	24061376	24095827	34451	56.86	1.96	25.49	5.455	Gap + Gain + Loss	Both
Brown Swiss	SVS	10	ROH24	23889533	24998515	1108982	28.039	23231567	24057642	826075	Loss	58.43	0.34	6.52	23889533	24057642	168109	52.95	0	7.5	16.425	Gap + Loss	Both
Brown Swiss	SVS	12	ROH28	72432362	72467225	34863	6.883	71291648	72509035	1217387	Loss	47.37	0	2.63	72432362	72467225	34863	47.37	0	2.63	6.883	Loss	CNV
Brown Swiss	SVS	16	ROH33	22077094	28701552	6624458	3.424	26570767	26576687	5920	Loss	50.94	0	0.06	26570767	26576687	5920	48.33	0	38.33	3.214	Loss	CNV
Brown Swiss	SVS	19	ROH37	45995134	48022931	2027797	4.201	46079413	46086725	7312	Loss	48.65	0	0.29	46079413	46086725	7312	48.57	0	47.14	2.959	Loss	CNV
Brown Swiss	SVS	25	ROH42	817031	2827677	2010646	3.716					52.64	0	0								None
Brown Swiss	Consensus	5	ROH05	16600378	19830701	3230323	3.772					58.18	0	0.07								None
Brown Swiss	Consensus	5	ROH07	75543085	77205976	1662891	3.887					64.9	0	0								None
Brown Swiss	Consensus	6	ROH08	5238677	6697815	1459138	28.632					74.4	0	0								Gap	Gap
Brown Swiss	Consensus	6	ROH09	32432759	34215534	1782775	3.28					59.18	0	0								None
Brown Swiss	Consensus	6	ROH10	38281115	39821580	1540465	3.344					85.62	0	0								None
Brown Swiss	Consensus	6	ROH11	49485001	49542605	57604	4.535					48.65	0	0								None
Brown Swiss	Consensus	6	ROH15	89145527	92887063	3741536	3.232					48.27	0	0								None
Brown Swiss	Consensus	7	ROH17	51178057	52533653	1355596	4.844					55.81	0	0								None
Brown Swiss	Consensus	10	ROH24	23889533	24998515	1108982	28.039					59.23	0.17	3.79								Gap	Gap
Brown Swiss	Consensus	12	ROH28	72432362	72467225	34863	6.883	72432362	72509035	76673	Both	48.07	0	6.19	72432362	72467225	34863	48.07	0	6.19	6.883	Gain + Loss	CNV
Brown Swiss	Consensus	16	ROH33	22077094	28701552	6624458	3.424					50.95	0	0.03								None
Brown Swiss	Consensus	19	ROH37	45995134	48022931	2027797	4.201					48.69	0.13	0.35								None
Brown Swiss	Consensus	25	ROH42	817031	2827677	2010646	3.716					52.62	0.17	0.28								None
Tyrol Grey	PennCNV	1	ROH01	83653181	85307764	1654583	4.244	83590335	83733826	143491	Loss	29.82	0	0.09	83653181	83733826	80645	22.65	0	1.92	4.753	Loss	CNV
Tyrol Grey	PennCNV	3	ROH03	72237329	73035441	798112	5.805					21.15	0	0								None
Tyrol Grey	PennCNV	4	ROH04	36340027	37684418	1344391	3.402					26.01	0	0								None
Tyrol Grey	PennCNV	6	ROH08	4950064	6752289	1802225	14.908					49.51	0	0								Gap	Gap
Tyrol Grey	PennCNV	6	ROH10	37291001	41838880	4547879	3.465					31.8	0	0								None
Tyrol Grey	PennCNV	7	ROH16	41956864	43373505	1416641	4.097	43271894	43330896	59002	Gain	27.07	0.38	0	43271894	43330896	59002	30.59	10.83	0	5.49	Gain	CNV
Tyrol Grey	PennCNV	7	ROH17	50966893	52940853	1973960	4.88					44.34	0	0								None
Tyrol Grey	PennCNV	8	ROH19	32974596	38923407	5948811	3.407	34543093	34661460	118367	Loss	26.46	0	0.12	34543093	34661460	118367	25	0	5.52	3.261	Loss	CNV
Tyrol Grey	PennCNV	9	ROH22	41027990	42194260	1166270	3.904					21.15	0	0								None
Tyrol Grey	PennCNV	9	ROH23	45453381	47072377	1618996	4.145					21.12	0	0								None
Tyrol Grey	PennCNV	10	ROH24	23319458	24480627	1161169	23.734	23651168	25297208	1646040	Both	22.59	4.11	2.63	23651168	24480627	829459	22.66	5.73	3.67	22.051	Gap + Gain + Loss	Both
Tyrol Grey	PennCNV	12	ROH27	42742472	44121483	1379011	5.002	42769193	42797339	28146	Loss	40.33	0	0.35	42769193	42797339	28146	20.87	0	4.59	5.267	Loss	CNV
Tyrol Grey	PennCNV	12	ROH27	42742472	44121483	1379011	5.002	42964295	43097164	132869	Loss	40.33	0	0.35	42964295	43097164	132869	42.31	0	1.92	4.18	Loss	CNV
Tyrol Grey	PennCNV	12	ROH28	70670517	75298059	4627542	12.783	75266781	75284908	18127	Gain	33.89	0.39	13.51	75266781	75284908	18127	31.92	3.08	0	4.705	Gap + Gain	Both
Tyrol Grey	PennCNV	12	ROH28	70670517	75298059	4627542	12.783	72174261	72264806	90545	Loss	33.89	0.39	13.51	72174261	72264806	90545	5.77	0	9.46	8.048	Gap + Loss	Both
Tyrol Grey	PennCNV	12	ROH28	70670517	75298059	4627542	12.783	70483913	72123747	1639834	Both	33.89	0.39	13.51	70670517	72123747	1453230	24.73	1.18	12.67	23.85	Gap + Gain + Loss	Both
Tyrol Grey	PennCNV	12	ROH28	70670517	75298059	4627542	12.783	72432362	74018916	1586554	Both	33.89	0.39	13.51	72432362	74018916	1586554	52.8	0.37	23.6	11.034	Gap + Gain + Loss	Both
Tyrol Grey	PennCNV	12	ROH28	70670517	75298059	4627542	12.783	74327005	75256383	929378	Loss	33.89	0.39	13.51	74327005	75256383	929378	48.87	0	15.67	25.09	Gap + Loss	Both
Tyrol Grey	PennCNV	15	ROH31	52873792	52890562	16770	2.212					21.15	0	0								None
Tyrol Grey	PennCNV	16	ROH32	6609810	7904840	1295030	14.98					35.5	0	0								Gap	Gap
Tyrol Grey	PennCNV	16	ROH34	44725782	44936271	210489	4.64					21.15	0	0								None
Tyrol Grey	PennCNV	17	ROH35	73586997	75132928	1545931	3.656	73700474	75132928	1432454	Loss	23.78	0	7.68	73700474	75132928	1432454	24.06	0	8.48	3.723	Loss	CNV
Tyrol Grey	PennCNV	18	ROH36	59045210	59641391	596181	8.631	58985987	59157300	171313	Loss	24.59	0	0.49	59045210	59157300	112090	24.53	0	2.12	7.506	Loss	CNV
Tyrol Grey	PennCNV	21	ROH39	553308	2582027	2028719	10.147	552613	620263	67650	Loss	34.65	0	0.35	553308	620263	66955	21.39	0	1.92	8.456	Gap + Loss	Both
Tyrol Grey	PennCNV	21	ROH39	553308	2582027	2028719	10.147	1042286	1264130	221844	Loss	34.65	0	0.35	1042286	1264130	221844	44.51	0	2.56	11.311	Gap + Loss	Both
Tyrol Grey	PennCNV	23	ROH40	43444	1858339	1814895	5.735	755655	768850	13195	Loss	44.09	0	0.23	755655	768850	13195	46.15	0	1.92	4.564	Loss	CNV
Tyrol Grey	PennCNV	23	ROH40	43444	1858339	1814895	5.735	43444	151779	108335	Loss	44.09	0	0.23	43444	151779	108335	47.17	0	1.89	6.505	Loss	CNV
Tyrol Grey	PennCNV	23	ROH40	43444	1858339	1814895	5.735	467839	538028	70189	Loss	44.09	0	0.23	467839	538028	70189	46.15	0	1.92	4.944	Loss	CNV
Tyrol Grey	PennCNV	27	ROH43	5122449	6250375	1127926	27.602					23.69	0	0								Gap	Gap
Tyrol Grey	PennCNV	29	ROH44	38674660	39576927	902267	12.489	39413453	39846954	433501	Loss	22.89	0	0.53	39413453	39576927	163474	23.08	0	1.92	9.704	Gap + Loss	Both
Tyrol Grey	SVS	1	ROH01	83653181	85307764	1654583	4.244					29.82	0	0								None
Tyrol Grey	SVS	3	ROH03	72237329	73035441	798112	5.805					21.15	0	0								None
Tyrol Grey	SVS	4	ROH04	36340027	37684418	1344391	3.402					26.01	0	0								None
Tyrol Grey	SVS	6	ROH08	4950064	6752289	1802225	14.908					49.51	0	0								Gap	Gap
Tyrol Grey	SVS	6	ROH10	37291001	41838880	4547879	3.465					31.8	0	0								None
Tyrol Grey	SVS	7	ROH16	41956864	43373505	1416641	4.097					27.01	0	0								None
Tyrol Grey	SVS	7	ROH17	50966893	52940853	1973960	4.88					44.34	0	0								None
Tyrol Grey	SVS	8	ROH19	32974596	38923407	5948811	3.407					26.46	0	0								None
Tyrol Grey	SVS	9	ROH22	41027990	42194260	1166270	3.904					21.15	0	0								None
Tyrol Grey	SVS	9	ROH23	45453381	47072377	1618996	4.145					21.12	0	0								None
Tyrol Grey	SVS	10	ROH24	23319458	24480627	1161169	23.734	23231567	24057642	826075	Loss	21.56	1.5	13.67	23319458	24057642	738184	20.98	0	16.36	22.565	Gap + Loss	Both
Tyrol Grey	SVS	10	ROH24	23319458	24480627	1161169	23.734	24061376	24143260	81884	Both	21.56	1.5	13.67	24061376	24143260	81884	22.64	11.32	16.98	5.455	Gap + Gain + Loss	Both
Tyrol Grey	SVS	12	ROH27	42742472	44121483	1379011	5.002					40.34	0	0								None
Tyrol Grey	SVS	12	ROH28	70670517	75298059	4627542	12.783	70483913	71274536	790623	Loss	33.74	0.04	24.11	70670517	71274536	604019	23.77	0	46.67	23.314	Gap + Loss	Both
Tyrol Grey	SVS	12	ROH28	70670517	75298059	4627542	12.783	72511101	72742881	231780	Loss	33.74	0.04	24.11	72511101	72742881	231780	54.72	0	26.42	3.439	Gap + Loss	Both
Tyrol Grey	SVS	12	ROH28	70670517	75298059	4627542	12.783	72748544	72966110	217566	Loss	33.74	0.04	24.11	72748544	72966110	217566	53.7	0	38.89	12.737	Gap + Loss	Both
Tyrol Grey	SVS	12	ROH28	70670517	75298059	4627542	12.783	73516942	73564769	47827	Both	33.74	0.04	24.11	73516942	73564769	47827	53.23	8.06	62.9	33.497	Gap + Gain + Loss	Both
Tyrol Grey	SVS	12	ROH28	70670517	75298059	4627542	12.783	74840021	75211295	371274	Loss	33.74	0.04	24.11	74840021	75211295	371274	51.85	0	48.15	22.534	Gap + Loss	Both
Tyrol Grey	SVS	12	ROH28	70670517	75298059	4627542	12.783	71276445	72042304	765859	Loss	33.74	0.04	24.11	71276445	72042304	765859	23.73	0	62.71	33.381	Gap + Loss	Both
Tyrol Grey	SVS	12	ROH28	70670517	75298059	4627542	12.783	73001857	73497775	495918	Loss	33.74	0.04	24.11	73001857	73497775	495918	52.21	0	44.64	36.164	Gap + Loss	Both
Tyrol Grey	SVS	12	ROH28	70670517	75298059	4627542	12.783	73583291	74828682	1245391	Loss	33.74	0.04	24.11	73583291	74828682	1245391	52.38	0	57.14	33.966	Gap + Loss	Both
Tyrol Grey	SVS	12	ROH28	70670517	75298059	4627542	12.783	75238779	75502589	263810	Loss	33.74	0.04	24.11	75238779	75298059	59280	33.88	0	1.92	4.995	Gap + Loss	Both
Tyrol Grey	SVS	15	ROH31	52873792	52890562	16770	2.212					21.15	0	0								None
Tyrol Grey	SVS	16	ROH32	6609810	7904840	1295030	14.98					35.5	0	0								Gap	Gap
Tyrol Grey	SVS	16	ROH34	44725782	44936271	210489	4.64					21.15	0	0								None
Tyrol Grey	SVS	17	ROH35	73586997	75132928	1545931	3.656	72929942	75148791	2218849	Loss	23.71	0	3.85	73586997	75132928	1545931	23.71	0	3.85	3.656	Loss	CNV
Tyrol Grey	SVS	18	ROH36	59045210	59641391	596181	8.631					24.7	0	0								None
Tyrol Grey	SVS	21	ROH39	553308	2582027	2028719	10.147					34.65	0	0								Gap	Gap
Tyrol Grey	SVS	23	ROH40	43444	1858339	1814895	5.735					44.03	0	0								None
Tyrol Grey	SVS	27	ROH43	5122449	6250375	1127926	27.602					23.69	0	0								Gap	Gap
Tyrol Grey	SVS	29	ROH44	38674660	39576927	902267	12.489					22.89	0	0								Gap	Gap
Tyrol Grey	Consensus	1	ROH01	83653181	85307764	1654583	4.244					29.82	0	0.04								None
Tyrol Grey	Consensus	3	ROH03	72237329	73035441	798112	5.805					21.15	0	0								None
Tyrol Grey	Consensus	4	ROH04	36340027	37684418	1344391	3.402					26.01	0	0								None
Tyrol Grey	Consensus	6	ROH08	4950064	6752289	1802225	14.908					49.51	0	0								Gap	Gap
Tyrol Grey	Consensus	6	ROH10	37291001	41838880	4547879	3.465					31.8	0	0								None
Tyrol Grey	Consensus	7	ROH16	41956864	43373505	1416641	4.097					27.04	0.19	0								None
Tyrol Grey	Consensus	7	ROH17	50966893	52940853	1973960	4.88					44.34	0	0								None
Tyrol Grey	Consensus	8	ROH19	32974596	38923407	5948811	3.407					26.46	0	0.06								None
Tyrol Grey	Consensus	9	ROH22	41027990	42194260	1166270	3.904					21.15	0	0								None
Tyrol Grey	Consensus	9	ROH23	45453381	47072377	1618996	4.145					21.12	0	0								None
Tyrol Grey	Consensus	10	ROH24	23319458	24480627	1161169	23.734	23651168	24057642	406474	Both	22.08	2.8	8.15	23651168	24057642	406474	21.59	1.41	10.3	18.861	Gap + Gain + Loss	Both
Tyrol Grey	Consensus	10	ROH24	23319458	24480627	1161169	23.734	24061376	24143260	81884	Both	22.08	2.8	8.15	24061376	24143260	81884	22.86	11.43	10.41	5.455	Gap + Gain + Loss	Both
Tyrol Grey	Consensus	12	ROH27	42742472	44121483	1379011	5.002					40.33	0	0.18								None
Tyrol Grey	Consensus	12	ROH28	70670517	75298059	4627542	12.783	75238779	75256383	17604	Loss	33.82	0.22	18.81	75238779	75256383	17604	48.63	0	2.2	9.032	Gap + Loss	Both
Tyrol Grey	Consensus	12	ROH28	70670517	75298059	4627542	12.783	75266781	75284908	18127	Both	33.82	0.22	18.81	75266781	75284908	18127	31.92	1.54	0.96	4.705	Gap + Gain + Loss	Both
Tyrol Grey	Consensus	12	ROH28	70670517	75298059	4627542	12.783	70483913	71274536	790623	Both	33.82	0.22	18.81	70670517	71274536	604019	24.28	0.38	27.41	23.314	Gap + Gain + Loss	Both
Tyrol Grey	Consensus	12	ROH28	70670517	75298059	4627542	12.783	72511101	72742881	231780	Both	33.82	0.22	18.81	72511101	72742881	231780	54.21	0.4	29.97	3.439	Gap + Gain + Loss	Both
Tyrol Grey	Consensus	12	ROH28	70670517	75298059	4627542	12.783	72748544	72966110	217566	Both	33.82	0.22	18.81	72748544	72966110	217566	54.26	0	28.99	12.737	Gap + Gain + Loss	Both
Tyrol Grey	Consensus	12	ROH28	70670517	75298059	4627542	12.783	73516942	73564769	47827	Both	33.82	0.22	18.81	73516942	73564769	47827	54.5	4.03	32.41	33.497	Gap + Gain + Loss	Both
Tyrol Grey	Consensus	12	ROH28	70670517	75298059	4627542	12.783	73583291	74018916	435625	Both	33.82	0.22	18.81	73583291	74018916	435625	54.93	0	30.13	23.902	Gap + Gain + Loss	Both
Tyrol Grey	Consensus	12	ROH28	70670517	75298059	4627542	12.783	74840021	75211295	371274	Loss	33.82	0.22	18.81	74840021	75211295	371274	50.59	0	33.03	22.534	Gap + Loss	Both
Tyrol Grey	Consensus	12	ROH28	70670517	75298059	4627542	12.783	71276445	72042304	765859	Both	33.82	0.22	18.81	71276445	72042304	765859	25.13	1.15	37.52	33.381	Gap + Gain + Loss	Both
Tyrol Grey	Consensus	12	ROH28	70670517	75298059	4627542	12.783	73001857	73497775	495918	Both	33.82	0.22	18.81	73001857	73497775	495918	53.29	0	23.61	36.164	Gap + Gain + Loss	Both
Tyrol Grey	Consensus	12	ROH28	70670517	75298059	4627542	12.783	74327005	74828682	501677	Loss	33.82	0.22	18.81	74327005	74828682	501677	48.98	0	38.4	37.276	Gap + Loss	Both
Tyrol Grey	Consensus	15	ROH31	52873792	52890562	16770	2.212					21.15	0	0								None
Tyrol Grey	Consensus	16	ROH32	6609810	7904840	1295030	14.98					35.5	0	0								Gap	Gap
Tyrol Grey	Consensus	16	ROH34	44725782	44936271	210489	4.64					21.15	0	0								None
Tyrol Grey	Consensus	17	ROH35	73586997	75132928	1545931	3.656	73700474	75132928	1432454	Loss	23.75	0	5.76	73700474	75132928	1432454	24.02	0	6.16	3.723	Loss	CNV
Tyrol Grey	Consensus	18	ROH36	59045210	59641391	596181	8.631					24.64	0	0.24								None
Tyrol Grey	Consensus	21	ROH39	553308	2582027	2028719	10.147					34.65	0	0.17								Gap	Gap
Tyrol Grey	Consensus	23	ROH40	43444	1858339	1814895	5.735					44.06	0	0.12								None
Tyrol Grey	Consensus	27	ROH43	5122449	6250375	1127926	27.602					23.69	0	0								Gap	Gap
Tyrol Grey	Consensus	29	ROH44	38674660	39576927	902267	12.489					22.89	0	0.26								Gap	Gap
Pinzgauer	PennCNV	2	ROH02	61126396	61886515	760119	2.967					19.77	0	0								None
Pinzgauer	PennCNV	5	ROH05	17815628	19234083	1418455	4.607					34.26	0	0								None
Pinzgauer	PennCNV	5	ROH06	29616940	32708704	3091764	3.76	31896234	31927058	30824	Loss	19.55	0	0.07	31896234	31927058	30824	20.48	0	7.1	4.323	Loss	CNV
Pinzgauer	PennCNV	6	ROH08	5092431	6752289	1659858	18.677	5062235	5298300	236065	Loss	69.31	0	2.05	5092431	5298300	205869	61.6	0	4.25	4.843	Gap + Loss	Both
Pinzgauer	PennCNV	6	ROH10	38198011	40707879	2509868	3.489	39131253	39177795	46542	Loss	48.96	0	0.04	39131253	39177795	46542	72.73	0	1.14	5.747	Loss	CNV
Pinzgauer	PennCNV	6	ROH10	38198011	40707879	2509868	3.489	39391155	39456708	65553	Loss	48.96	0	0.04	39391155	39456708	65553	72.41	0	1.15	4.007	Loss	CNV
Pinzgauer	PennCNV	6	ROH12	66881120	68005195	1124075	3.19					22.95	0	0								None
Pinzgauer	PennCNV	6	ROH13	70992402	72259859	1267457	3.48					21.03	0	0								None
Pinzgauer	PennCNV	6	ROH14	79811800	82148240	2336440	3.48	80741948	80755942	13994	Loss	24.31	0	0.03	80741948	80755942	13994	28.41	0	1.14	5.477	Loss	CNV
Pinzgauer	PennCNV	6	ROH14	79811800	82148240	2336440	3.48	81268693	81279597	10904	Loss	24.31	0	0.03	81268693	81279597	10904	22.99	0	1.15	4.698	Loss	CNV
Pinzgauer	PennCNV	6	ROH14	79811800	82148240	2336440	3.48	80650200	80665501	15301	Loss	24.31	0	0.03	80650200	80665501	15301	28.74	0	1.15	2.34	Loss	CNV
Pinzgauer	PennCNV	6	ROH15	92075115	93312295	1237180	2.33					19.55	0	0								None
Pinzgauer	PennCNV	7	ROH17	50934029	54040194	3106165	4.055	52596769	52602998	6229	Loss	30.98	0	0.01	52596769	52602998	6229	32.39	0	1.14	4.292	Loss	CNV
Pinzgauer	PennCNV	7	ROH18	55500414	55505723	5309	3.76					18.39	0	0								None
Pinzgauer	PennCNV	8	ROH20	110543983	110650592	106609	39.798					18.39	0	0								Gap	Gap
Pinzgauer	PennCNV	8	ROH21	112888559	113367096	478537	25.829					25.12	0	0								Gap	Gap
Pinzgauer	PennCNV	10	ROH24	23889533	24998515	1108982	28.039	23180741	25231436	2050695	Both	28.88	8.82	2.13	23889533	24998515	1108982	28.88	8.82	2.13	28.039	Gap + Gain + Loss	Both
Pinzgauer	PennCNV	11	ROH25	95832985	96995965	1162980	3.627	96538529	96756491	217962	Loss	19.24	0	0.14	96538529	96756491	217962	19.32	0	1.14	5.631	Loss	CNV
Pinzgauer	PennCNV	11	ROH26	102280331	103339896	1059565	3.194					18.72	0	0								None
Pinzgauer	PennCNV	12	ROH28	70620665	75272584	4651919	13.109	72271847	72329951	58104	Loss	29.14	1.65	7.35	72271847	72329951	58104	9.26	0	1.15	1.81	Gap + Loss	Both
Pinzgauer	PennCNV	12	ROH28	70620665	75272584	4651919	13.109	72369351	72388328	18977	Loss	29.14	1.65	7.35	72369351	72388328	18977	10.34	0	1.15	3.093	Gap + Loss	Both
Pinzgauer	PennCNV	12	ROH28	70620665	75272584	4651919	13.109	75238779	75293758	54979	Gain	29.14	1.65	7.35	75238779	75272584	33805	28.23	3.67	0	7.943	Gap + Gain	Both
Pinzgauer	PennCNV	12	ROH28	70620665	75272584	4651919	13.109	72168225	72264806	96581	Loss	29.14	1.65	7.35	72168225	72264806	96581	10.9	0	8.84	7.499	Gap + Loss	Both
Pinzgauer	PennCNV	12	ROH28	70620665	75272584	4651919	13.109	70392108	72123747	1731639	Both	29.14	1.65	7.35	70620665	72123747	1503082	24.18	2.66	8.14	23.514	Gap + Gain + Loss	Both
Pinzgauer	PennCNV	12	ROH28	70620665	75272584	4651919	13.109	72432362	73666963	1234601	Both	29.14	1.65	7.35	72432362	73666963	1234601	41.26	2.91	13.16	9.599	Gap + Gain + Loss	Both
Pinzgauer	PennCNV	12	ROH28	70620665	75272584	4651919	13.109	74369197	74894950	525753	Loss	29.14	1.65	7.35	74369197	74894950	525753	35.35	0	11.72	29.744	Gap + Loss	Both
Pinzgauer	PennCNV	14	ROH29	53164234	54030636	866402	3.888					18.39	0	0								None
Pinzgauer	PennCNV	15	ROH30	51502997	52640360	1137363	3.024	51681720	51714539	32819	Loss	20.28	0	0.05	51681720	51714539	32819	19.83	0	1.15	4.606	Loss	CNV
Pinzgauer	PennCNV	15	ROH30	51502997	52640360	1137363	3.024	52130826	52153934	23108	Loss	20.28	0	0.05	52130826	52153934	23108	21.59	0	1.14	3.952	Loss	CNV
Pinzgauer	PennCNV	16	ROH32	6643328	7868828	1225500	19.958					34.37	0	0								Gap	Gap
Pinzgauer	PennCNV	20	ROH38	4547590	5017896	470306	3.339					22.18	0	0								None
Pinzgauer	PennCNV	21	ROH39	20065	2741767	2721702	9.59	5191	351692	346501	Loss	29.45	0	0.93	20065	351692	331627	18.39	0	1.15	11.432	Gap + Loss	Both
Pinzgauer	PennCNV	21	ROH39	20065	2741767	2721702	9.59	902295	1854171	951876	Loss	29.45	0	0.93	902295	1854171	951876	43.28	0	3.28	13.654	Gap + Loss	Both
Pinzgauer	PennCNV	23	ROH40	43444	1310624	1267180	5.962	993247	1025081	31834	Loss	18.45	0	0.35	993247	1025081	31834	19.32	0	2.27	8.684	Loss	CNV
Pinzgauer	PennCNV	23	ROH40	43444	1310624	1267180	5.962	471774	538028	66254	Loss	18.45	0	0.35	471774	538028	66254	18.98	0	4.77	4.886	Loss	CNV
Pinzgauer	PennCNV	23	ROH41	25669376	26742222	1072846	29.718	25669376	25881173	211797	Both	22.58	0.58	0.24	25669376	25881173	211797	21.42	1.95	0.82	21.682	Gap + Gain + Loss	Both
Pinzgauer	SVS	2	ROH02	61126396	61886515	760119	2.967					19.77	0	0								None
Pinzgauer	SVS	5	ROH05	17815628	19234083	1418455	4.607					34.26	0	0								None
Pinzgauer	SVS	5	ROH06	29616940	32708704	3091764	3.76					19.55	0	0								None
Pinzgauer	SVS	6	ROH08	5092431	6752289	1659858	18.677					69.25	0	0								Gap	Gap
Pinzgauer	SVS	6	ROH10	38198011	40707879	2509868	3.489					48.95	0	0								None
Pinzgauer	SVS	6	ROH12	66881120	68005195	1124075	3.19					22.95	0	0								None
Pinzgauer	SVS	6	ROH13	70992402	72259859	1267457	3.48	72075063	72077236	2173	Loss	21.06	0	0.51	72075063	72077236	2173	29.41	0	62.5	2.121	Loss	CNV
Pinzgauer	SVS	6	ROH14	79811800	82148240	2336440	3.48	81170090	81186411	16321	Loss	24.31	0	0.18	81170090	81186411	16321	23.66	0	61.07	2.979	Loss	CNV
Pinzgauer	SVS	6	ROH15	92075115	93312295	1237180	2.33					19.55	0	0								None
Pinzgauer	SVS	7	ROH17	50934029	54040194	3106165	4.055					30.98	0	0								None
Pinzgauer	SVS	7	ROH18	55500414	55505723	5309	3.76					18.39	0	0								None
Pinzgauer	SVS	8	ROH20	110543983	110650592	106609	39.798					18.39	0	0								Gap	Gap
Pinzgauer	SVS	8	ROH21	112888559	113367096	478537	25.829					25.12	0	0								Gap	Gap
Pinzgauer	SVS	10	ROH24	23889533	24998515	1108982	28.039	24061376	24095827	34451	Both	29.37	0.5	5.48	24061376	24095827	34451	31.73	2.88	25.96	5.455	Gap + Gain + Loss	Both
Pinzgauer	SVS	10	ROH24	23889533	24998515	1108982	28.039	23231567	24057642	826075	Loss	29.37	0.5	5.48	23889533	24057642	168109	27.79	0	3.41	16.425	Gap + Loss	Both
Pinzgauer	SVS	11	ROH25	95832985	96995965	1162980	3.627					19.26	0	0								None
Pinzgauer	SVS	11	ROH26	102280331	103339896	1059565	3.194					18.72	0	0								None
Pinzgauer	SVS	12	ROH28	70620665	75272584	4651919	13.109	71411993	72042304	630311	Loss	29.49	0.41	23.89	71411993	72042304	630311	23.81	0	33.33	33.381	Gap + Loss	Both
Pinzgauer	SVS	12	ROH28	70620665	75272584	4651919	13.109	72432362	72509035	76673	Loss	29.49	0.41	23.89	72432362	72509035	76673	40.52	0	17.35	3.214	Gap + Loss	Both
Pinzgauer	SVS	12	ROH28	70620665	75272584	4651919	13.109	72511101	72814919	303818	Both	29.49	0.41	23.89	72511101	72814919	303818	43.4	1.89	27.36	3.973	Gap + Gain + Loss	Both
Pinzgauer	SVS	12	ROH28	70620665	75272584	4651919	13.109	74840021	75193156	353135	Loss	29.49	0.41	23.89	74840021	75193156	353135	35.2	0	55.2	22.534	Gap + Loss	Both
Pinzgauer	SVS	12	ROH28	70620665	75272584	4651919	13.109	70451847	71399213	947366	Loss	29.49	0.41	23.89	70620665	71399213	778548	22.71	0	41.35	22.609	Gap + Loss	Both
Pinzgauer	SVS	12	ROH28	70620665	75272584	4651919	13.109	72058027	72419043	361016	Loss	29.49	0.41	23.89	72058027	72419043	361016	12.73	0	1.15	3.334	Gap + Loss	Both
Pinzgauer	SVS	12	ROH28	70620665	75272584	4651919	13.109	72819475	73497775	678300	Loss	29.49	0.41	23.89	72819475	73497775	678300	42.05	0	37.5	35.94	Gap + Loss	Both
Pinzgauer	SVS	12	ROH28	70620665	75272584	4651919	13.109	73516942	74828682	1311740	Loss	29.49	0.41	23.89	73516942	74828682	1311740	42.99	0	54.92	33.941	Gap + Loss	Both
Pinzgauer	SVS	14	ROH29	53164234	54030636	866402	3.888					18.39	0	0								None
Pinzgauer	SVS	15	ROH30	51502997	52640360	1137363	3.024					20.26	0	0								None
Pinzgauer	SVS	16	ROH32	6643328	7868828	1225500	19.958					34.37	0	0								Gap	Gap
Pinzgauer	SVS	20	ROH38	4547590	5017896	470306	3.339					22.18	0	0								None
Pinzgauer	SVS	21	ROH39	20065	2741767	2721702	9.59					29.36	0	0								Gap	Gap
Pinzgauer	SVS	23	ROH40	43444	1310624	1267180	5.962					18.39	0	0								None
Pinzgauer	SVS	23	ROH41	25669376	26742222	1072846	29.718	25846520	25875898	29378	Both	22.79	0.22	4.37	25846520	25875898	29378	22.22	1.01	20.2	16.036	Gap + Gain + Loss	Both
Pinzgauer	Consensus	2	ROH02	61126396	61886515	760119	2.967					19.77	0	0								None
Pinzgauer	Consensus	5	ROH05	17815628	19234083	1418455	4.607					34.26	0	0								None
Pinzgauer	Consensus	5	ROH06	29616940	32708704	3091764	3.76					19.55	0	0.03								None
Pinzgauer	Consensus	6	ROH08	5092431	6752289	1659858	18.677					69.28	0	1.03								Gap	Gap
Pinzgauer	Consensus	6	ROH10	38198011	40707879	2509868	3.489					48.96	0	0.02								None
Pinzgauer	Consensus	6	ROH12	66881120	68005195	1124075	3.19					22.95	0	0								None
Pinzgauer	Consensus	6	ROH13	70992402	72259859	1267457	3.48					21.04	0	0.26								None
Pinzgauer	Consensus	6	ROH14	79811800	82148240	2336440	3.48					24.31	0	0.11								None
Pinzgauer	Consensus	6	ROH15	92075115	93312295	1237180	2.33					19.55	0	0								None
Pinzgauer	Consensus	7	ROH17	50934029	54040194	3106165	4.055					30.98	0	0								None
Pinzgauer	Consensus	7	ROH18	55500414	55505723	5309	3.76					18.39	0	0								None
Pinzgauer	Consensus	8	ROH20	110543983	110650592	106609	39.798					18.39	0	0								Gap	Gap
Pinzgauer	Consensus	8	ROH21	112888559	113367096	478537	25.829					25.12	0	0								Gap	Gap
Pinzgauer	Consensus	10	ROH24	23889533	24998515	1108982	28.039	24061376	24095827	34451	Both	29.13	4.66	3.8	24061376	24095827	34451	31.6	5.54	13.52	5.455	Gap + Gain + Loss	Both
Pinzgauer	Consensus	10	ROH24	23889533	24998515	1108982	28.039	23231567	24057642	826075	Both	29.13	4.66	3.8	23889533	24057642	168109	27.55	5.62	3.19	16.425	Gap + Gain + Loss	Both
Pinzgauer	Consensus	11	ROH25	95832985	96995965	1162980	3.627					19.25	0	0.07								None
Pinzgauer	Consensus	11	ROH26	102280331	103339896	1059565	3.194					18.72	0	0								None
Pinzgauer	Consensus	12	ROH28	70620665	75272584	4651919	13.109	72271847	72329951	58104	Loss	29.32	1.03	15.62	72271847	72329951	58104	9.26	0	1.15	1.81	Gap + Loss	Both
Pinzgauer	Consensus	12	ROH28	70620665	75272584	4651919	13.109	72369351	72388328	18977	Loss	29.32	1.03	15.62	72369351	72388328	18977	10.34	0	1.15	3.093	Gap + Loss	Both
Pinzgauer	Consensus	12	ROH28	70620665	75272584	4651919	13.109	71411993	72042304	630311	Both	29.32	1.03	15.62	71411993	72042304	630311	24.9	3.34	20.81	33.381	Gap + Gain + Loss	Both
Pinzgauer	Consensus	12	ROH28	70620665	75272584	4651919	13.109	72058027	72123747	65720	Both	29.32	1.03	15.62	72058027	72123747	65720	24.54	0.7	5.15	6.787	Gap + Gain + Loss	Both
Pinzgauer	Consensus	12	ROH28	70620665	75272584	4651919	13.109	72168225	72264806	96581	Loss	29.32	1.03	15.62	72168225	72264806	96581	11.24	0	5	7.499	Gap + Loss	Both
Pinzgauer	Consensus	12	ROH28	70620665	75272584	4651919	13.109	72432362	72509035	76673	Both	29.32	1.03	15.62	72432362	72509035	76673	40.12	0.41	15.77	3.214	Gap + Gain + Loss	Both
Pinzgauer	Consensus	12	ROH28	70620665	75272584	4651919	13.109	72511101	72814919	303818	Both	29.32	1.03	15.62	72511101	72814919	303818	42.22	2.79	21.43	3.973	Gap + Gain + Loss	Both
Pinzgauer	Consensus	12	ROH28	70620665	75272584	4651919	13.109	73516942	73666963	150021	Both	29.32	1.03	15.62	73516942	73666963	150021	46.68	0	29.71	28.198	Gap + Gain + Loss	Both
Pinzgauer	Consensus	12	ROH28	70620665	75272584	4651919	13.109	74840021	74894950	54929	Loss	29.32	1.03	15.62	74840021	74894950	54929	34.32	0	35.94	15.344	Gap + Loss	Both
Pinzgauer	Consensus	12	ROH28	70620665	75272584	4651919	13.109	70451847	71399213	947366	Both	29.32	1.03	15.62	70620665	71399213	778548	22.88	0	24.47	22.609	Gap + Gain + Loss	Both
Pinzgauer	Consensus	12	ROH28	70620665	75272584	4651919	13.109	72819475	73497775	678300	Both	29.32	1.03	15.62	72819475	73497775	678300	42.27	1.84	21.23	35.94	Gap + Gain + Loss	Both
Pinzgauer	Consensus	12	ROH28	70620665	75272584	4651919	13.109	74369197	74828682	459485	Loss	29.32	1.03	15.62	74369197	74828682	459485	36.2	0	31.74	38.907	Gap + Loss	Both
Pinzgauer	Consensus	14	ROH29	53164234	54030636	866402	3.888					18.39	0	0								None
Pinzgauer	Consensus	15	ROH30	51502997	52640360	1137363	3.024					20.27	0	0.03								None
Pinzgauer	Consensus	16	ROH32	6643328	7868828	1225500	19.958					34.37	0	0								Gap	Gap
Pinzgauer	Consensus	20	ROH38	4547590	5017896	470306	3.339					22.18	0	0								None
Pinzgauer	Consensus	21	ROH39	20065	2741767	2721702	9.59					29.4	0	0.46								Gap	Gap
Pinzgauer	Consensus	23	ROH40	43444	1310624	1267180	5.962					18.42	0	0.18								None
Pinzgauer	Consensus	23	ROH41	25669376	26742222	1072846	29.718	25846520	25875898	29378	Both	22.69	0.4	2.31	25846520	25875898	29378	21.73	1.63	10.59	16.036	Gap + Gain + Loss	Both

## Sheet: Table S5
Table S5
Description of the ROH islands that were identified as artefacts due to coverage gaps and consensus CNVR with both copy loss (copy loss or both copy loss and copy gain)
Breed	Chromosome	ROH island					CNVR				Proportions within ROH island			Intersection			Proportions within intersection			Event
		ID	Start	End	Length	IMD	Start	End	Length	Copy state	ROH	Copy gain	Copy loss	Start	End	Length	ROH	Copy gain	Copy loss
Brown Swiss	6	ROH08	5238677	6697815	1459138	28.632					74.4	0	0							Gap
Brown Swiss	10	ROH24	23889533	24998515	1108982	28.039					59.23	0.17	3.79							Gap
Brown Swiss	12	ROH28	72432362	72467225	34863	6.883	72432362	72509035	76673	Both	48.07	0	6.19	72432362	72467225	34863	48.07	0	6.19	Gain + Loss
Pinzgauer	6	ROH08	5092431	6752289	1659858	18.677					69.28	0	1.03							Gap
Pinzgauer	8	ROH20	110543983	110650592	106609	39.798					18.39	0	0							Gap
Pinzgauer	8	ROH21	112888559	113367096	478537	25.829					25.12	0	0							Gap
Pinzgauer	10	ROH24	23889533	24998515	1108982	28.039	23231567	24057642	826075	Both	29.13	4.66	3.8	23889533	24057642	168109	27.55	5.62	3.19	Gap + Gain + Loss
Pinzgauer	10	ROH24	23889533	24998515	1108982	28.039	24061376	24095827	34451	Both	29.13	4.66	3.8	24061376	24095827	34451	31.6	5.54	13.52	Gap + Gain + Loss
Pinzgauer	12	ROH28	70620665	75272584	4651919	13.109	70451847	71399213	947366	Both	29.32	1.03	15.62	70620665	71399213	778548	22.88	0	24.47	Gap + Gain + Loss
Pinzgauer	12	ROH28	70620665	75272584	4651919	13.109	71411993	72042304	630311	Both	29.32	1.03	15.62	71411993	72042304	630311	24.9	3.34	20.81	Gap + Gain + Loss
Pinzgauer	12	ROH28	70620665	75272584	4651919	13.109	72058027	72123747	65720	Both	29.32	1.03	15.62	72058027	72123747	65720	24.54	0.7	5.15	Gap + Gain + Loss
Pinzgauer	12	ROH28	70620665	75272584	4651919	13.109	72168225	72264806	96581	Loss	29.32	1.03	15.62	72168225	72264806	96581	11.24	0	5	Gap + Loss
Pinzgauer	12	ROH28	70620665	75272584	4651919	13.109	72271847	72329951	58104	Loss	29.32	1.03	15.62	72271847	72329951	58104	9.26	0	1.15	Gap + Loss
Pinzgauer	12	ROH28	70620665	75272584	4651919	13.109	72369351	72388328	18977	Loss	29.32	1.03	15.62	72369351	72388328	18977	10.34	0	1.15	Gap + Loss
Pinzgauer	12	ROH28	70620665	75272584	4651919	13.109	72432362	72509035	76673	Both	29.32	1.03	15.62	72432362	72509035	76673	40.12	0.41	15.77	Gap + Gain + Loss
Pinzgauer	12	ROH28	70620665	75272584	4651919	13.109	72511101	72814919	303818	Both	29.32	1.03	15.62	72511101	72814919	303818	42.22	2.79	21.43	Gap + Gain + Loss
Pinzgauer	12	ROH28	70620665	75272584	4651919	13.109	72819475	73497775	678300	Both	29.32	1.03	15.62	72819475	73497775	678300	42.27	1.84	21.23	Gap + Gain + Loss
Pinzgauer	12	ROH28	70620665	75272584	4651919	13.109	73516942	73666963	150021	Both	29.32	1.03	15.62	73516942	73666963	150021	46.68	0	29.71	Gap + Gain + Loss
Pinzgauer	12	ROH28	70620665	75272584	4651919	13.109	74369197	74828682	459485	Loss	29.32	1.03	15.62	74369197	74828682	459485	36.2	0	31.74	Gap + Loss
Pinzgauer	12	ROH28	70620665	75272584	4651919	13.109	74840021	74894950	54929	Loss	29.32	1.03	15.62	74840021	74894950	54929	34.32	0	35.94	Gap + Loss
Pinzgauer	16	ROH32	6643328	7868828	1225500	19.958					34.37	0	0							Gap
Pinzgauer	21	ROH39	20065	2741767	2721702	9.59					29.4	0	0.46							Gap
Pinzgauer	23	ROH41	25669376	26742222	1072846	29.718	25846520	25875898	29378	Both	22.69	0.4	2.31	25846520	25875898	29378	21.73	1.63	10.59	Gap + Gain + Loss
Tyrol Grey	6	ROH08	4950064	6752289	1802225	14.908					49.51	0	0							Gap
Tyrol Grey	10	ROH24	23319458	24480627	1161169	23.734	23651168	24057642	406474	Both	22.08	2.8	8.15	23651168	24057642	406474	21.59	1.41	10.3	Gap + Gain + Loss
Tyrol Grey	10	ROH24	23319458	24480627	1161169	23.734	24061376	24143260	81884	Both	22.08	2.8	8.15	24061376	24143260	81884	22.86	11.43	10.41	Gap + Gain + Loss
Tyrol Grey	12	ROH28	70670517	75298059	4627542	12.783	70483913	71274536	790623	Both	33.82	0.22	18.81	70670517	71274536	604019	24.28	0.38	27.41	Gap + Gain + Loss
Tyrol Grey	12	ROH28	70670517	75298059	4627542	12.783	71276445	72042304	765859	Both	33.82	0.22	18.81	71276445	72042304	765859	25.13	1.15	37.52	Gap + Gain + Loss
Tyrol Grey	12	ROH28	70670517	75298059	4627542	12.783	72511101	72742881	231780	Both	33.82	0.22	18.81	72511101	72742881	231780	54.21	0.4	29.97	Gap + Gain + Loss
Tyrol Grey	12	ROH28	70670517	75298059	4627542	12.783	72748544	72966110	217566	Both	33.82	0.22	18.81	72748544	72966110	217566	54.26	0	28.99	Gap + Gain + Loss
Tyrol Grey	12	ROH28	70670517	75298059	4627542	12.783	73001857	73497775	495918	Both	33.82	0.22	18.81	73001857	73497775	495918	53.29	0	23.61	Gap + Gain + Loss
Tyrol Grey	12	ROH28	70670517	75298059	4627542	12.783	73516942	73564769	47827	Both	33.82	0.22	18.81	73516942	73564769	47827	54.5	4.03	32.41	Gap + Gain + Loss
Tyrol Grey	12	ROH28	70670517	75298059	4627542	12.783	73583291	74018916	435625	Both	33.82	0.22	18.81	73583291	74018916	435625	54.93	0	30.13	Gap + Gain + Loss
Tyrol Grey	12	ROH28	70670517	75298059	4627542	12.783	74327005	74828682	501677	Loss	33.82	0.22	18.81	74327005	74828682	501677	48.98	0	38.4	Gap + Loss
Tyrol Grey	12	ROH28	70670517	75298059	4627542	12.783	74840021	75211295	371274	Loss	33.82	0.22	18.81	74840021	75211295	371274	50.59	0	33.03	Gap + Loss
Tyrol Grey	12	ROH28	70670517	75298059	4627542	12.783	75238779	75256383	17604	Loss	33.82	0.22	18.81	75238779	75256383	17604	48.63	0	2.2	Gap + Loss
Tyrol Grey	12	ROH28	70670517	75298059	4627542	12.783	75266781	75284908	18127	Both	33.82	0.22	18.81	75266781	75284908	18127	31.92	1.54	0.96	Gap + Gain + Loss
Tyrol Grey	16	ROH32	6609810	7904840	1295030	14.98					35.5	0	0							Gap
Tyrol Grey	17	ROH35	73586997	75132928	1545931	3.656	73700474	75132928	1432454	Loss	23.75	0	5.76	73700474	75132928	1432454	24.02	0	6.16	Loss
Tyrol Grey	21	ROH39	553308	2582027	2028719	10.147					34.65	0	0.17							Gap
Tyrol Grey	27	ROH43	5122449	6250375	1127926	27.602					23.69	0	0							Gap
Tyrol Grey	29	ROH44	38674660	39576927	902267	12.489					22.89	0	0.26							Gap
